1  
2  
3  
4  
5  
6  
7  
8  
9  
10  
11  
12  
13  
14  
15  
16  
17  
18  
19  
20  
21  
22  
23  
24  
25  
26  
27  
28

**Mixing the Message: Do Dung Beetles (Coleoptera: Scarabaeidae) Affect Dung-Generated  
Greenhouse Gas Emissions?**

Fallon Fowler<sup>1</sup>, Christopher J. Gillespie<sup>2\*</sup>, Steve Denning<sup>1¶</sup>, Shuijin Hu<sup>2¶</sup>, and Wes Watson<sup>1¶</sup>

<sup>1</sup> Department of Entomology and Plant Pathology, North Carolina State University, Grinnells Animal Health Laboratories, Raleigh, North Carolina, United States of America

<sup>2</sup> Department of Entomology and Plant Pathology, North Carolina State University, Raleigh, North Carolina, United States of America

\*Corresponding author

Email: [cjgilles@ncsu.edu](mailto:cjgilles@ncsu.edu) (CG)

¶These authors contributed equally to this work.

## 29 **Abstract**

30 By mixing and potentially aerating dung, dung beetles may affect the microbes producing the  
31 greenhouse gases (GHGs): carbon dioxide (CO<sub>2</sub>), methane (CH<sub>4</sub>), and nitrous oxide (N<sub>2</sub>O). Here,  
32 their sum-total global warming effect is described as the carbon dioxide equivalent (CO<sub>2</sub>e). Our  
33 literature analysis of reported GHG emissions and statistics suggests that most dung beetles do  
34 not, however, reduce CO<sub>2</sub>e even if they do affect individual GHGs. Here, we compare the GHG  
35 signature of homogenized (“premixed”) and unhomogenized (“unmixed”) dung with and without  
36 dung beetles to test whether mixing and burial influence GHGs. Mixing by hand or by dung  
37 beetles did not reduce any GHG – in fact, tunneling dung beetles increased N<sub>2</sub>O medians by  
38 ≥1.8x compared with dung-only. This suggests that either: 1) dung beetles do not meaningfully  
39 mitigate GHGs as a whole; 2) dung beetle burial activity affects GHGs more than mixing alone;  
40 or 3) greater dung beetle abundance and activity is required to produce an effect.

41

42 **Keywords:** Dung Beetle, Tunneling, Dwelling, Greenhouse Gas, Dung Decomposition

43

## 44 **Introduction**

45 Dung beetles (Coleoptera: Scarabaeidae) provide beneficial ecosystem services including  
46 improved nutrient recycling, competitive exclusion of pests and parasites, reduced animal  
47 disease incidence, and improved soil percolation and plant growth (Nichols et al. 2008). These  
48 arthropods also mitigate damaging ecological impacts such as water and soil pollution, and  
49 increased GHG production such as found in animal agriculture. These impacts are the result of  
50 excessive land-use, heavy reliance on fossil fuels, and concentrated animal waste that destroy

51 and damage wildlife habitats (Steinfeld et al. 2006). In fact, animal agriculture produces 37%  
52 and 65% of global anthropogenic  $\text{CH}_4$  and  $\text{N}_2\text{O}$  emissions (Steinfeld et al. 2006), with manure  
53 management accounting for 4.3% (not including deposited dung emissions) and ~17% of  
54 livestock-produced  $\text{CH}_4$  and  $\text{N}_2\text{O}$ , respectively (Gerber et al. 2013). Thriving dung beetle  
55 communities combat and sustainably restore dung-polluted habitats (Doube 2018), and so are  
56 ideal animals with which to study the GHG-resource recycling connection (Sylvia et al. 2005).

57

58 Recently, researchers investigated how dung beetles affect individual GHGs (Penttilä et al. 2013,  
59 Iwasa et al. 2015, Hammer et al. 2016a, Slade et al. 2016a, Piccini et al. 2017, Evans et al. 2019).  
60 Very often they reported net beneficial dung beetle effects (Iwasa et al. 2015, Hammer et al.  
61 2016a, Slade et al. 2016a, Piccini et al. 2017) despite not reducing the total  $\text{CO}_2\text{e}$  calculated from  
62  $\text{CH}_4$ ,  $\text{CO}_2$ , and  $\text{N}_2\text{O}$  (Table 1).

**Table 1.** A summary of the exact GHG fluxes between dung beetles (DB) and dung-only (DO) from data and analyses of past authors.

| Literature           | Group | CH <sub>4</sub> | CO <sub>2</sub>     | N <sub>2</sub> O | CH <sub>4</sub> +N <sub>2</sub> O <sub>e</sub> | CO <sub>2</sub> e    |
|----------------------|-------|-----------------|---------------------|------------------|------------------------------------------------|----------------------|
| Evans et al. 2019    | DB    | -0.0 ± 0.1a     | 8.3 ± 0.2a          | 0.6 ± 0.1a       | 178 ± 32a*                                     | 8,478 ± 232a*        |
|                      | DO    | -0.2 ± 0.1b     | 8.1 ± 0.2a          | 0.2 ± 0.1b       | 56 ± 32b*                                      | 8,156 ± 232a*        |
| Hammer et al. 2016a  | DB    | 919 ± 55a       | 1,160,184 ± 56,762a | 312 ± 48a        | --                                             | 1,253,019 ± 67,039a* |
|                      | DO    | 1,457 ± 205b    | 1,088,054 ± 40,750a | 103 ± 20b        | --                                             | 1,160,216 ± 42,231a* |
| Iwasa et al. 2015    | DB    | 1.66 ± 0.068a   | 270.8 ± 61.4a       | 0.23a            | --                                             | 379.9 ± 63.1a*       |
|                      | DO    | 2.88 ± 0.12b    | 72.5 ± 36.9b        | 0.18b            | --                                             | 112.94 ± 4.62b*      |
| Penttilä et al. 2013 | DB    | 1.071 ± 0.246a  | 2,924 ± 297a        | 0.136 ± 0.037a   | --                                             | 2,991 ± 297a         |
|                      | DO    | 1.770 ± 0.376b  | 2,956 ± 236a        | 0.028 ± 0.020b   | --                                             | 3,009 ± 231a         |
| Slade et al. 2016ab  | DB    | 2,342 ± 70a*    | -- a                | 467 ± 38a*       | 217,421 ± 11,845a*                             | --                   |
|                      | DO    | 2,746 ± 220a*   | -- a                | 476 ± 98a*       | 235,200 ± 34,306a*                             | --                   |

Differing letters represent significant differences (p<0.05) between groups.

---

Piccini et al. 2017 not shown since only 1 of 6 dung beetle groups decreased CO<sub>2</sub>e.

For Evan et al. 2019's, we assumed DB ~ 0.044 (rounded down to 0) and DO ~ 0.151 (rounded up to 2) for a conservative CH<sub>4</sub> analysis for Table 4.

\* Data was manually entered, where CH<sub>4</sub> (=25 CO<sub>2</sub>e), CO<sub>2</sub> (=1 CO<sub>2</sub>e), and N<sub>2</sub>O (=298 CO<sub>2</sub>e). CO<sub>2</sub>e represents the sum of CH<sub>4</sub>, CO<sub>2</sub>, and N<sub>2</sub>O;

CH<sub>4</sub>+N<sub>2</sub>Oe represents the sum of CH<sub>4</sub> and N<sub>2</sub>O.

---

64

65 Less than half of current studies reported total CO<sub>2</sub>e (Penttilä et al. 2013, Piccini et al. 2017,  
66 Fowler et al. 2020c) which unintentionally obscures an important component: dung beetles'  
67 overall atmospheric effect (Yokoyama et al. 1991ab, Iwasa et al. 2015, Hammer et al. 2016a,  
68 Slade et al. 2016b, Evans et al. 2019). Reporting CO<sub>2</sub>e can inform funding agencies which  
69 ecological projects may bring about the most benefit – so if CO<sub>2</sub>e is unchanged, then climate  
70 change remains unmitigated and potentially no additional C- and/or N-based resources are  
71 stored. To fully calculate CO<sub>2</sub>e we suggest not only focusing on CH<sub>4</sub> and N<sub>2</sub>O emissions (e.g.  
72 Slade et al. 2016a) but also aerobic (CO<sub>2</sub>-based) phenomena as this can dramatically alter results  
73 (i.e. Iwasa et al. 2015, Evans et al. 2019). So, while studying individual GHGs will still help  
74 inform resource recycling mechanisms, such as those found during microbial (Yokoyama et al.  
75 1991a, Slade et al. 2016b) and chemical surveys (Yokoyama et al. 1991ab, Evans et al. 2019);  
76 including a net atmospheric effect provides more information at no cost. Therefore, we have  
77 compiled and analyzed the literature to reevaluate dung beetles' aggregate GHG effects, report  
78 conflicting patterns, and note interesting analyses.

79

80 Early research showed that dung beetle groups reduced CH<sub>4</sub>, increased N<sub>2</sub>O, but saw no effect on  
81 CO<sub>2</sub> or CO<sub>2</sub>e when reviewing their pairwise comparisons (see Penttilä et al. 2013 from Table 1)  
82 instead of their general ANOVA's. They theorized that dung beetle activity could reduce  
83 anaerobic-based GHGs, primarily methanogenesis (CH<sub>4</sub> production), by supporting aerobic  
84 activity associated with low dung moisture and increased aeration (Penttilä et al. 2013).  
85 Meanwhile, Yokoyama et al. (1991ab) showed dung beetles also increased N-release by  
86 promoting ammonification, nitrification, and (incomplete) denitrification, thus generating the

87 anaerobic-based  $\text{N}_2\text{O}$  (Sylvia et al. 2005). Yet if dung beetles reduce  $\text{CH}_4$ , but increase  $\text{N}_2\text{O}$ , and  
88 no  $\text{CO}_2\text{e}$  effect is observed, then are dung beetles climate neutral? By delving into the published  
89 literature, we see that dung beetles show no  $\text{CO}_2\text{e}$  reductions and argue their known effect is  
90 negligible (Table 1).  
91  
92 Slade et al. (2016a) reported that dung beetles reduced  $\text{CH}_4+\text{N}_2\text{Oe}$  (Fig 3 from Slade et al.  
93 2016a) by reducing  $\text{CH}_4$ , but not  $\text{N}_2\text{O}$ , via citing significant treatment by day interactions;  
94 however, interactions indicate that treatments were changing differently over time rather than  
95 showing overall main effect differences between treatments, which is a subtle, but important,  
96 distinction. Our goal is to see if dung beetles can decay dung and reduce dung-based GHGs  
97 faster than time alone, which requires a stand-alone treatment effect. Using the reported standard  
98 errors, the published data (Supp. Mat. from Slade et al. 2016a) show dung beetles appeared to  
99 significantly reduce  $\text{CH}_4$  (dung beetles:  $39.8 \pm 1.22$  vs. dung-only:  $46.5 \pm 3.73$  mg gas/m<sup>2</sup>/d), but  
100 not  $\text{N}_2\text{O}$  (dung beetles:  $7.91 \pm 0.641$  vs. dung-only:  $8.07 \pm 1.66$  mg gas/m<sup>2</sup>/d), leading to no  
101 overall  $\text{CH}_4+\text{N}_2\text{Oe}$  effect (dung beetles:  $3,709 \pm 210$  vs. dung-only:  $3,986 \pm 581$  mg gas/m<sup>2</sup>/d).  
102 Understandably, non-overlapping standard errors usually suggest significant differences, but this  
103 rule is assumed and does not apply (Skidmore and Thompson 2013) when using unequal sample  
104 sizes (n=30: dung beetles vs. n=3: dung-only). Therefore, we retrieved the raw data (Slade,  
105 personal communication) and saw there was no overall dung beetle effect (see Supp. Table D7  
106 for the statistical details) for  $\text{CH}_4$  (t=-1.75; df=1,32; p=0.23),  $\text{N}_2\text{O}$  (t=-0.09; df=1,32; p=0.94), or  
107  $\text{CH}_4+\text{N}_2\text{Oe}$  (t=-0.49; df=1,32; p=0.64), nor did Slade et al. (2016b) show any differences for  $\text{CO}_2$   
108 for which no raw data was available to analyze (Table 1). Therefore, dung beetles are climate  
109 and carbon neutral – not positive. By including main effect analyses and by visibly showing and

110 reporting the extrapolated variation graphically (adding upper and lower variation limits to Fig 3  
111 from Slade et al. 2016a) and numerically (mean  $\pm$  variation) in the main journal body – we can  
112 enhance data analysis and suggest interesting, alternative interpretations.

113

114 Hammer et al. (2016a) studied how dung beetles influenced and were influenced by dung from  
115 cattle, with and without antibiotics. They also measured dung beetles' impact on GHG  
116 emissions. They saw dung beetles decreased  $\text{CH}_4$ , increased  $\text{N}_2\text{O}$ , and had no effect on  $\text{CO}_2$   
117 emissions relative to the non-antibiotic dung-only (Table 1). Interested in the overall warming  
118 effects, we also analyzed the supplemental data supplied online (Hammer et al. 2016b) and saw  
119 no dung beetle effect ( $t=1.17$ ;  $df=1,19$ ;  $p=0.25$ : see Supp. Table D7 for statistical details) when  
120 comparing non-antibiotic dung pats with and without dung beetles, respectively (Table 1).

121

122 Piccini et al. (2017) investigated whether dung beetle diversity affected GHGs differently as our  
123 experimental design currently does. The authors favored using the unadjusted p-value rather than  
124 the adjusted p-value (which accounts for familywise error and reduces the number of false  
125 positives – Wilcox et al. 2013) though both were supplied. Using their reported p-adjusted values  
126 for their general ANOVA's, an alternative interpretation shows that the dung beetles (treatment  
127 only) had no cumulative effect on  $\text{CH}_4$ ,  $\text{CO}_2$ , or  $\text{N}_2\text{O}$  fluxes, though there were  $\text{CO}_2\text{e}$  differences  
128 (Supp. Table F from Piccini et al. 2017). Even so, the modified GLS model (Supp. Table I from  
129 Piccini et al. 2017) and multiple pairwise comparison tests (Supp. Table H from Piccini et al.  
130 2017) showed that only the one of the six dung beetle treatment, the most diverse group, reduced  
131  $\text{CO}_2\text{e}$ . This alternatively suggests that most experimental dung beetle groups are climate neutral.

132



133 Some studies found beneficial effects, others found negative effects or conflicting patterns. Iwasa  
134 et al. (2015) reported that dung beetles reduced  $\text{CH}_4$ , but greatly increased  $\text{CO}_2$ ,  $\text{N}_2\text{O}$ , and, when  
135 approximated,  $\text{CO}_2\text{e}$  (Table 1). Evans et al. (2019) found dung beetles increased  $\text{CO}_2$  on specific  
136 days and, surprisingly,  $\text{CH}_4$  overall – even though these gases are frequently produced under  
137 radically different conditions. Regardless, dung beetles had an increased (climate warming)  
138 effect on  $\text{N}_2\text{O}$ ,  $\text{CH}_4+\text{N}_2\text{Oe}$  (Evans et al. 2019), but not on  $\text{CO}_2$  or  $\text{CO}_2\text{e}$  when approximated  
139 (Table 1). The pattern becomes that Penttilä et al. (2013), Hammer et al. (2016a), Slade et al.  
140 (2016ab), Piccini et al. (2017), and Evan et al. (2019) found dung beetle activity to be climate  
141 neutral, while Iwasa et al. (2015) found dung beetle activity to be climate negative (i.e. a GHG  
142 source).

143

144 We initially studied (Supp. Table D1, Supp. Fig G's) whether different dung beetle activities  
145 (tunneling vs. dwelling) under field chamber conditions influenced GHGs differently, but  
146 discovered negligible  $\text{CO}_2\text{e}$  effects. The reexamined literature also suggests this. One  
147 methodological aspect common within all of these studies, including our original experiment, is  
148 that we homogenized and standardized the dung prior to adding dung beetles – but if mixing  
149 (homogenizing) aerates the dung and reduces GHG-producing microbes, what is the difference  
150 between mixing the dung by hand or with dung beetles? We hypothesize that: 1) mixing dung  
151 obscures a dung beetle's effect on GHGs, and 2) that dung beetles can reduce  $\text{CO}_2\text{e}$ . By  
152 including a homogenization (unmixed dung-only) control, repeating the experiment, and  
153 increasing our replicates, we asked whether the negligible dung beetle effect was because of  
154 randomness, methodology, or incomplete theory.

155

## 156 **Materials and methods**

### 157 **Experimental Design**

158 Here we report *two designs* and perspectives from a *single dataset*: the combined 2016-2017  
159 design (Supp. Table D1, Figs G1-G4) and the 2017 unmixed design (Supp. Table D2, Figs 3-6).

160 The **combined design** asks if dung beetle activity (tunneling vs. dwelling) affects the mixed  
161 dung-only using more replicates, while the **unmixed design** asks if mixing (homogenization)  
162 itself confounds the results. Since it is unknown whether mixed versus unmixed dung produces  
163 different GHG fluxes, dung beetles were added only to the standardized, mixed dung to reduce  
164 labor/costs, redundancy, and unwanted assumptions. The results from the combined and unmixed  
165 designs are practically identical (see Supp. Section A for minute differences) and so we will  
166 focus only on the more extensive unmixed design, which also forms a part of the combined  
167 design (see Table 2's footnotes).

**Table 2.** The experimental designs used in 2016 and 2017

| Treatment    | Beetle | Dung | Grass | Purpose                                                                                                          |
|--------------|--------|------|-------|------------------------------------------------------------------------------------------------------------------|
| Tunn         | ✓      | ✓    | ✓     | To visualize if different dung behaviors (tunneling vs. dwelling) affects dung generated GHGs in different ways. |
| Dwell        | ✓      | ✓    | ✓     |                                                                                                                  |
| TunnDwell    | ✓      | ✓    | ✓     |                                                                                                                  |
| Mixed Dung   |        | ✓    | ✓     | The standardized treatment controls allow for comparison and environmental monitoring.                           |
| Grass        |        |      | ✓     |                                                                                                                  |
| Unmixed Dung |        | ✓    | ✓     | The homogenization controls assess if this methodology confounds results.                                        |
| Pasture      |        |      | ✓     |                                                                                                                  |

Where Tunn (=Tunneler, *Onthophagus taurus*) and Dwell (=Dweller, *Labarrus pseudolividus*)

Combined design (=Standard treatments only from both 2016 & 2017); n=21 rep/treatment/day.

Unmixed design (=Pasture + Standard treatments from 2017 only); n=12 rep/treatment/day.

Vegetative Controls = Pasture or Grass-only treatments.

Unmixed Dung = unhomogenized, unstandardized, untouched, variable.

Mixed Dung = homogenized (mixed), standardized, set amount.

170 We repeated our experiments once per month (n=4 experiments) during the summer totaling 12  
171 replicates per treatment for the unmixed design (June to September 2017) and 21 replicates for  
172 the combined design (May to September 2016, June to September 2017). Using a randomized  
173 complete block design (n=3 blocks/experiment), we measured GHGs (CH<sub>4</sub>, CO<sub>2</sub>, N<sub>2</sub>O) over the  
174 course of two weeks (0, 1, 3, 7, 14d) using GHG chambers (n=1 treatment/block; Fig 1) at the  
175 grassy pastures of the beef unit (Lat. 35°43'47.40"N, Long. 78°41'15.50"W) at NCSU Lake  
176 Wheeler Road Field Lab (Raleigh, North Carolina, USA). On both 0d and 14d, we: 1) collected  
177 and dried dung and soil cores in the oven at 55°C to measure moisture loss (Supp. Table D6; for  
178 both data and method descriptions), and 2) visually monitored dung damage (see photographs in  
179 Fig 2) to track dung beetle-induced abiotic changes. The dataset included a variety of pasture  
180 sites, weather conditions, dung compositions, and dung beetle populations as is naturally  
181 expected when replicating across various seasons, years, and herds, and this helps increase  
182 scientific rigor and applicability (Casler 2015).

183

184 **Fig 1. Layout and chamber positioning.**

185 The standard site consists of a mowed field outside of cattle pastures, while the pasture site  
186 consists of a recently used cattle pasture. See Supp. Section A for more detail about site  
187 differences.

188

189 The unmixed design called for two distinct sampling locations and treatments (Table 2) using  
190 cattle dung from the same beef herd: the **standard** site and the **pasture** site (Fig 1) of which  
191 detailed differences are described in Supp. Section A. The standard site required we bury GHG  
192 chambers outside of cattle pastures, such that the anchor wall was five inches tall, at least 3

193 weeks pre-experiment to mimic published designs (e.g. Penttilä et al. 2013, Slade et al. 2016a).  
194 On 0d, we added ~1000g of fresh (<5min old), premixed (by hand, dung only) cattle dung (Supp.  
195 Fig A) and the appropriate treatments. Meanwhile, the pasture site measured arbitrarily lain dung  
196 pats within cattle pastures using mobile GHG chambers alongside netted cages (Fig 1), which: a)  
197 avoided chamber-induced microclimates, b) reduced destructive chamber burial on pastures, and  
198 c) prevented dung arthropod entry. Both sites used the same sampling equipment (Fig 2). Fowler  
199 et al. (2020b) discusses and analyzes the physical chamber designs and the gas sampling  
200 strategies.

201

## 202 **Fig 2. Visual comparison of experimental treatments.**

203 Examples of the (A) Tunn; (B) Dwell; (C) TunnDwell; (D) Mixed Dung; and (E) Unmixed Dung  
204 treatments; including a naturally colonized dung pat (F). Similarities between the dung beetle  
205 occupied treatments and the native dung pat suggests study treatments were representative of  
206 natural dung beetle activity.

207

## 208 **Dung Beetle Collection & Treatment Layout**

209 Dung beetles were grouped by nesting behaviors: endocoprids (“dwellers” or Dwell),  
210 paracoprids (“tunnelers” or Tunn), and telecoprids (“rollers”). Dwellers ‘shred’ or ‘mix’ the dung  
211 from within; tunnelers bury dung (‘brood’) balls beneath the pat; rollers roll the dung ball away  
212 and bury it elsewhere (Bertone et al. 2004). We focused specifically on dwellers and tunnelers  
213 because: 1) In North Carolina, the tunneler, *Onthophagus taurus* (Schreber), and dweller,  
214 *Labarrus (Aphodius) pseudolividus* (Balthasar), are abundant on cattle pastures (Bertone et al.  
215 2005) – this ensured adequate replication across seasons and years; 2) both tunnelers and rollers

216 exhibit burial activity, thus studying dwellers and tunnelers fully represent our desired behavioral  
217 repertoire. Following an additive design, we measured each dung-use group together and apart,  
218 while also including mixed dung-only, unmixed dung-only, and grass/pasture-only ('vegetative')  
219 controls (Table 2). Labor and material constraints restricted additional replicates solely for the  
220 pasture-only control (n=4), but this unbalanced design was accounted for statistically by using  
221 more conservative analyses (see *Statistics*). We collected dung beetles by floating and sorting  
222 them (see Fowler et al. 2020a for methodology, stats, and other details) within 48 hrs pre-  
223 experiment and held them in incubators at 12°C (L:D 16:8) with moistened towelettes until use.  
224 We measured 3 grams of dung beetles<sup>3</sup> per treatment (Table 2) to avoid confounding dung beetle  
225 size and number. This biomass was selected because the damaged dung of our treatments (Fig  
226 2A-C) was similar to the dung damage found naturally in the field (Fig 2F), which indicated an  
227 optimal representation of dung beetle activity. Additionally, we conducted small-scale  
228 respiration studies pre-0d to examine if dung beetles produced ample greenhouse gases, but dung  
229 beetles were found only to respire elevated CO<sub>2</sub> and so will only be briefly discussed (see Supp.  
230 Section B for more detailed methods and analyses).

231  
232 **Statistics.** First, we conducted power tests (packages: "pwr", "pwr2") in the R statistical  
233 program (R Development Team, Geneva, Switzerland; <http://www.r-project.org>) to estimate the  
234 required sample sizes for 60% power given our number of contrasts (Supp. Mat. P). Second, we  
235 acknowledged any heterogeneous variation, extreme outliers, and positive skewness (Erceg-Hurn  
236 and Mirosevich 2008) using Wilcox's Robust Statistics (package: WRS) (Wilcox 2013) by:

237

238 A. Winsorizing extreme outliers to allow focus on gas majority representation,

239 B. identifying skewed outliers using modified M-estimators,  
240 C. bootstrapping the data ( $n_{boot}=500$  to 600) to calculate the proportion showing  $p \leq 0.05$ , and  
241 D. using the Benjamini–Hochberg procedure to account for familywise error, which creates  
242 Type II errors (“false positives”) by chance when evaluating multiple comparisons.

243  
244 We did this for both mean-based (ANOVA) and median-based (Effect Size) analyses for both the  
245 combined (Supp. Table D1, Supp. Figs G1-G4) and unmixed designs (Supp. Table D2, Figs 3-6).  
246 Lastly, we provided a simplified treatment layout (Figs 3-6) which combined all dung beetle  
247 treatments (Tunn, Dwell, and Tunn + Dwell otherwise known as TunnDwell) into a single group  
248 (Beetle) for ease-of-use since the results were identical (Supp. Table D1 vs. Supp. Table D2).

249

## 250 **Conversions, Tables, & Graphs**

251 We converted our original GHG measurements (ppm) into fluxes ( $\text{mg gas}/\text{m}^2/\text{d}$ ) using sampling  
252 time, headspace volume (Chamber Volume - Dung Volume), and temperature expansion ratios,  
253 and by applying the modified Hutchinson and Mosier method (package: HMR) to calculate  
254 linear/nonlinear HMR fluxes (Venterea and Parkin 2012). Total  $\text{CO}_2\text{e}$  were calculated as the sum  
255 of the global warming potential impact factor over 100 years (IPCC 2007) as follows:  $\text{CH}_4$  (=25  
256  $\text{CO}_2\text{e}$ ),  $\text{CO}_2$  (=1  $\text{CO}_2\text{e}$ ), and  $\text{N}_2\text{O}$  (=298  $\text{CO}_2\text{e}$ ). We have included treatment, time, and  
257 treatment:time interactions (marginal means), graphs, and tables for both the combined design  
258 (Supp. Figs G1-4, Supp. Table D1) and unmixed design (Figs 3-6, Supp. Table D2). Relevant  
259 statistics (ANOVA’s + effect sizes) are presented on all figures, but we also provided  
260 supplemental statistics (Supp. Section D), power analyses (Supp. Section P), respiratory analyses  
261 (Supp. Section B), and graphs (Supp. Section G).

262

## 263 **Results**

264 By using the unmixed design (Figs 3-6) we tested if mixing obscured a dung beetle effect, and by  
265 using the combined design (Supp. Figs G1-4) we tested if dung beetles had any effect. Any  
266 treatment differences reported here are not due to site or vegetative (Grass-only vs. Pasture-only)  
267 differences as we found no overall vegetative differences for  $\text{CH}_4$  ( $t=0.05$ ,  $p=0.96$ ),  $\text{CO}_2$  ( $t=0.99$ ,  
268  $p=0.33$ ),  $\text{N}_2\text{O}$  ( $t=1.98$ ,  $p=0.054$ ), or  $\text{CO}_2\text{e}$  ( $t=0.82$ ,  $p=0.42$ ) nor dung-to-chamber volume ratios  
269 between sites (Supp. Fig G6). We will examine two types of statistics here to present a more  
270 nuanced view of our data: the p-value and effect sizes. The p-value is the likelihood that the  
271 between-group mean difference ( $\neq 0$ ) seen is potentially a false positive a certain percentage  
272 ( $\sim 5\%$  when  $\alpha=0.05$ ) of the time given accurate ANOVA assumptions and sufficient power  
273 (Colquhoun 2014). Meanwhile the effect *size* reflects the *magnitude* of reported differences to  
274 help aid interpretative conclusions (a small/weak, medium, and large/strong explanatory measure  
275 of effect is considered at least  $E=0.15$ ,  $0.30$ , and  $0.50$ , respectively – Wilcox et al. 2012).

276

## 277 **Methane**

278 Treatment had no effect on  $\text{CH}_4$  fluxes in the combined ( $E=0.008$ , Supp. Fig G1) or unmixed  
279 design ( $E=0.09$ , Fig 3); meanwhile time steadily reduced  $\text{CH}_4$  by  $>200\text{x}$  by 7d ( $E=0.91-0.98$ ,  
280 Figs 4, G2) showing time as the strongest predictor. Only TunnDwell groups reduced  $\text{CH}_4$  by  
281  $2.31\text{x}$  compared with mixed dung-only on 3d alone (Supp. Fig G3). Similarly, unmixed dung-  
282 only produced  $2.83\text{x}$  and  $3.71\text{x}$  more  $\text{CH}_4$  (Supp. Table D2) than dung beetles and mixed dung-  
283 only groups (Fig 5) solely on 1d – revealing that neither dung beetles nor hand-mixing



284 meaningfully affected weekly  $\text{CH}_4$  fluxes compared to natural decay. Although the unmixed  
285 dung-only produced 1.50x (mean) and 1.38x (median) more than the mixed dung-containing  
286 treatments overall (Supp. Table D2), the general effect was negligible (Fig 3). This increase  
287 could be because:

288

289 **Fig 3. Violin box plots of HMR Flux by Treatment.**

290 Each quadrant represents a GHG including  $\text{CH}_4$  (top left),  $\text{CO}_2$  (top right),  $\text{N}_2\text{O}$  (bottom left), and  
291  $\text{CO}_2\text{e}$  (bottom right) with their respective omnibus mean-based ANOVA's ( $F_{df_{num}, df_{den}}$ ) and  
292 median-based Explanatory Effect (E) Sizes shown above. Pairwise comparisons of ANOVA's  
293 (lowercase letters) are shown within the graph. Sample sizes (n) are shown underneath each  
294 treatment and total samples (N) are shown along the x-axis. Differing letters between groups  
295 show differences ( $p \leq 0.05$ ). Exact means, medians, and measures of variations are found in Supp.  
296 Table D2.

297

298 1) *site-based vegetative differences*: however, the grass-only and pasture-only controls (Table 2)  
299 produced  $<1 \text{ mg } \text{CH}_4/\text{m}_2/\text{d}$  on any given day, so all  $\text{CH}_4$  fluxes are dung-based;

300

301 2) *different chamber and dung volumes between sites*: this could theoretically bias certain  
302 treatments toward greater fluxes, but given that unmixed dung-only sizes were random (often  
303 larger) and measured using field-based chamber methods (larger volume) - the total dung-to-  
304 chamber volume ratios between sites were similar (see Supp. Section A for a more in-depth  
305 discussion of calculations and analyses). After all, any biases would show up on 0d if the  
306 ratios were different, but this did not occur (Supp. Fig G6); and

307

308 3) *between-site variances*: mixed (homogenized) dung in the semi-permanent (buried) chambers  
309 could have reduced variation compared with unmixed dung (non-homogenized) of the non-  
310 standardized (unburied) pastured treatments, thus resulting in reduced power to detect  
311 differences. Yet no variation differences were found between the unmixed and mixed dung-  
312 only ( $p>0.05$ ) across a week (Supp. Fig G8).

313

314 If mixing itself was a factor in affecting GHGs we would expect to see differences between the  
315 mixed and unmixed dung-only treatments on 0d. However, there were no differences and the  
316 mixed dung-only treatment produced slightly more  $\text{CH}_4$  despite being presumably more aerated.  
317 Likely it is because fresh cattle dung is liquid-like, and so mixed dung easily reforms and inhibits  
318 aeration. However, dung beetles physically affected the dung (Fig 2) through more constant  
319 mixing, enhanced desiccation (Supp. Table D6), and presumably greater aeration; yet, we  
320 observed no dung beetle advantage in reducing  $\text{CH}_4$ , thereby suggesting time and dung-presence  
321 are the only meaningful factors for  $\text{CH}_4$  generation.

322

## 323 **Carbon Dioxide**

324 Treatment had no effect on  $\text{CO}_2$  fluxes in either the combined (Supp. Fig G1) or unmixed design  
325 (Fig 3). Comparatively, time had a strong reductive effect ( $E=0.70-0.80$ ) compared with  
326 treatments ( $E=0.07-0.10$ ), as  $\text{CO}_2$  fluxes declined by  $>1.9x$  from 0d to 7d (Supp. Fig G2) or 14d  
327 (Fig 4). Oddly, we expected dung beetles to increase  $\text{CO}_2$  fluxes given their own respiration and  
328 aerating/aerobic-based activities, but our (Supp. Fig B) and Piccini et al. (2017)'s respiration  
329 studies showed that dung beetle respiration was  $<1.5\%$  of a single day's  $\text{CO}_2$  emissions (see

330 Supp. Section B for further discussion). Curiously, while treatments mostly showed no  
331 differences (Supp. Fig G3), the unmixed dung-only produced less CO<sub>2</sub> fluxes than the mixed  
332 dung groups on 0d (Fig 5) and showed slower week-long declines (Fig 6). This was,  
333 respectively, due to the pasture-control influencing the unmixed dung-only's reported fluxes, for  
334 example:

335

336 **Fig 4. Violin box plots of HMR Flux by Time.**

337 Each quadrant represents a GHG including CH<sub>4</sub> (top left), CO<sub>2</sub> (top right), N<sub>2</sub>O (bottom left), and  
338 CO<sub>2</sub>e (bottom right) with their respective omnibus mean-based ANOVA's ( $F_{df_{num}, df_{den}}$ ) and  
339 median-based Explanatory Effect (E) Sizes shown above. Pairwise comparisons of ANOVA's  
340 (lowercase letters) and Effect Sizes (uppercase letters) are shown within the graph. Sample size  
341 (n) and total samples (N) are shown along the x-axis. Differing letters between groups show  
342 differences ( $p \leq 0.05$ ). Exact means, medians, and measures of variations are found in Supp. Table  
343 D2.

344

345 **Fig 5. Violin box plots of HMR Flux by Treatment within Time.**

346 Each quadrant represents a GHG including CH<sub>4</sub> (top left), CO<sub>2</sub> (top right), N<sub>2</sub>O (bottom left), and  
347 CO<sub>2</sub>e (bottom right) with their respective omnibus mean-based ANOVA's ( $F_{df_{num}, df_{den}}$ ) and  
348 median-based Explanatory Effect (E) Sizes shown above. Pairwise comparisons of ANOVA's  
349 (lowercase letters) are shown within the graph. Sample sizes (n) are shown underneath each  
350 treatment and total samples (N) are shown along the x-axis. Differing letters between groups  
351 show differences ( $p \leq 0.05$ ). Exact means, medians, and measures of variations are found in Supp.  
352 Table D2.

353 **Fig 6. Violin box plots of HMR Flux by Time within Treatment.**

354 Each quadrant represents a GHG including CH<sub>4</sub> (top left), CO<sub>2</sub> (top right), N<sub>2</sub>O (bottom left), and  
355 CO<sub>2</sub>e (bottom right) with their respective omnibus mean-based ANOVA's ( $F_{df\ num, df\ den}$ ) and  
356 median-based Explanatory Effect (E) Sizes shown above. Pairwise comparisons of ANOVA's  
357 (lowercase letters) are shown within the graph. Sample sizes (n) are shown underneath each  
358 treatment and total samples (N) are shown along the x-axis. Differing letters between groups  
359 show differences ( $p \leq 0.05$ ). Exact means, medians, and measures of variations are found in Supp.  
360 Table D2.

361

362 1) by producing 1.62x less CO<sub>2</sub> ( $t=0.19$ ,  $p=0.08$ ) than the grass-only on 0d (Supp. Table D2),  
363 and

364

365 2) by producing 1.07x more CO<sub>2</sub> ( $t=2.41$ ,  $p=0.056$ ) over time (Fig 6) because it was not  
366 regularly cut as the grass-only was and grew over time. Thus, the drop in CO<sub>2</sub> for the  
367 unmixed dung-only group was similar to other mixed dung groups and was masked initially,  
368 thus the decline appeared more slowly – regardless, any small differences were negligible  
369 ( $p > 0.05$ ).

370

371 In all, dung-containing groups produced >1.69x the CO<sub>2</sub> compared with their vegetative controls,  
372 thus showing dung-presence enhances CO<sub>2</sub>. Overall, dung beetles had no CO<sub>2</sub> effect, while only  
373 time and dung-presence had strong, reliable effects (Fig 4).

374

375 **Nitrous Oxide.** Unlike the other gases, treatment showed a small-to-medium effect on median  
376  $\text{N}_2\text{O}$  fluxes for both the unmixed design ( $E=0.21$ , Fig 3) and when combining years ( $E=0.30$ ,  
377 Supp. Fig G1), while time had a small-to-strong effect ( $E=0.22$ , Supp. Fig G2;  $E=0.54$ , Fig 4).  
378 As with all main effect analyses, data aggregated across time or treatment obscures differences  
379 between high-performance treatments and strong time effects, therefore day-by-day analysis was  
380 required for differentiation. For the treatments: the unmixed design showed dung beetle groups  
381 producing an average of 2.6x more  $\text{N}_2\text{O}$  than the mixed dung-only on 3d alone (Fig 5,  $E=0.62$ ).  
382 This increase was due to the Tunn and TunnDwell groups producing  $>2.6x$  and  $>1.86x$  the  
383 average  $\text{N}_2\text{O}$  of the mixed dung-only and Dwell, respectively (Supp. Fig G3,  $E=0.44$ ). This  
384 suggests specific dung beetle behavior matters. Interestingly, while there were no variation  
385 differences ( $p>0.05$ ) between the unmixed and mixed dung-only (Supp. Fig G8), the dung beetle  
386 groups produced a greater frequency of larger fluxes ( $p=0$ ) and a smaller frequency of minimums  
387 ( $p=0$ ) (Supp. Fig G7) reflecting the significant omnibus and effect size analyses (Fig 3). This  
388 suggests tunneler-activity, but not mixing nor dwelling-activity, specifically generated more  $\text{N}_2\text{O}$   
389 ( $1.57x$ ) than unmixed dung-only despite its weak effects (Fig 3). Curiously, our vegetative  
390 controls did not show  $\text{N}_2\text{O}$  spikes following rain events, as they do in agricultural soils (Sylvia et  
391 al. 2005), perhaps because vegetation retains moisture more consistently across time than bare  
392 soil, and so produces consistent low-emissions in grassy pastures.  
393  
394 Nevertheless, the strongest effects on  $\text{N}_2\text{O}$  were time and dung-presence, especially relative to  
395 the vegetation-only controls. Grass and pasture-only treatments produced similar, low-emission  
396 trends across time (Supp. Table D2) (Fig 6), often generating 0.10-0.50x the amount of the dung-  
397 containing treatments on any given day. Across time, the dung-containing groups produced 2.59-

398 7.26x more N<sub>2</sub>O than their respective vegetative controls, thus showing dung's propensity for  
399 N<sub>2</sub>O generation (Fig 6) until complete decay (see the desiccated dung in Fig 2). Dung (Supp. Fig  
400 G9) and soil (Supp. Fig G10) moisture loss regressions showed that greater soil moisture was  
401 positively correlated (R<sup>2</sup>=0.33, p=0) with greater N<sub>2</sub>O fluxes as expected, but there was  
402 surprisingly no relationship with dung moisture content (R<sup>2</sup>=0.02, p=0.98) – in contrast, CH<sub>4</sub>,  
403 CO<sub>2</sub>, and CO<sub>2</sub>e were positively correlated with dung moisture loss (Supp. Fig G9, p≤0.01), but  
404 not soil moisture loss (Supp. Fig G10, p≥0.05), despite the positive correlations between soil and  
405 dung moisture loss. Understandable given that CH<sub>4</sub> is generated almost solely by dung (dung-  
406 presence generated 622.8x more CH<sub>4</sub> than vegetation-only), while CO<sub>2</sub>/CO<sub>2</sub>e is heavily  
407 influenced by dung moisture simply because it is also correlated with dung decay, gradual  
408 aeration, and other time-related variables (multicollinearity effect). But N<sub>2</sub>O offers a different  
409 picture: dung-containing treatments held 1.22x more soil moisture than the vegetation-only  
410 (Supp. Table D6), with Tunnelers reducing dung moisture content by 1.78x compared with  
411 mixed dung-only (Supp. Table D6, p=0). In short, drier dung correlated with increased soil  
412 moisture, likely from dung leaching both moisture and nutrients to the surrounding soil, with  
413 active dung-burial species potentially enhancing this process and increasing their N<sub>2</sub>O fluxes due  
414 to soil activity (Supp. Fig G3).

415  
416 Each quadrant represents a GHG including CH<sub>4</sub> (top left), CO<sub>2</sub> (top right), N<sub>2</sub>O (bottom left), and  
417 CO<sub>2</sub>e (bottom right) with their respective omnibus mean-based ANOVA's (F<sub>df num, df den</sub>) and  
418 median-based Explanatory Effect (E) Sizes shown above. Pairwise comparisons of ANOVA's  
419 (lowercase letters) and Effect Sizes (uppercase letters) are shown within the graph. Sample size  
420 (n) and total samples (N) are shown along the x-axis. Differing letters between groups show

421 differences ( $p \leq 0.05$ ). Exact means, medians, and measures of variations are found in Supp. Table  
422 D2.

423

## 424 **Total Greenhouse Gas Effect**

425 CO<sub>2</sub>e is calculated by determining the relative effects of each GHG. For example, 98.87% of all  
426 GHGs collected was solely CO<sub>2</sub>, but since CH<sub>4</sub> and N<sub>2</sub>O enjoy a larger greenhouse effect, they  
427 respectively contributed to 23.07 and 7.28% of the total effect (Supp. Fig G5). Even so, CO<sub>2</sub>  
428 commands 69.65% of the sum-total CO<sub>2</sub>e which is why CO<sub>2</sub>e graphs (Figs 3-6, Supp. Figs G1-  
429 G4) predominately follow CO<sub>2</sub> trends. Treatment had no effect (~1x) on CO<sub>2</sub>e ( $E < 0.12$ , Fig 3),  
430 and the small reduction of CO<sub>2</sub>e on 0d was attributed to the vegetative differences as described in  
431 the *Carbon dioxide* section. Comparatively, time steadily reduced CO<sub>2</sub>e by 3.24x (Fig 6) over the  
432 course of a week ( $E = 0.85$ , Fig 4). Ultimately, dung beetles were climate neutral and carbon  
433 neutral (neither storing nor releasing resources).

434 In summary, we see that neither dung beetles nor mixing affected the average CH<sub>4</sub>, CO<sub>2</sub>, N<sub>2</sub>O,  
435 and CO<sub>2</sub>e, though dung beetles did increase N<sub>2</sub>O medians. Time, meanwhile, drastically reduced  
436 CH<sub>4</sub>, CO<sub>2</sub> and CO<sub>2</sub>e across a week, while inconsistently increasing N<sub>2</sub>O resulting from dung  
437 beetle interactions. Ultimately, we eliminated our hypothesis that mixing masked dung beetle  
438 effects and found no dung beetle effect on GHGs.

439

## 440 **Discussion**

441 Since the early 1980s, an increasing number of researchers studied how arthropods and annelids  
442 – such as termites (Sugimoto et al. 2000), dung beetles (Yokoyama et al. 1991ab), and  
443 earthworms (Lubbers et al. 2013) – affected the GHG emissions of plant litter, soil, and/or dung.

444 These arthropods affected the decomposition rates and microbial pathways driving carbon (C)  
445 and nitrogen (N) storage/release throughout the environment. For example, by reducing C and N  
446 lost to the atmosphere, it is instead used and stored terrestrially (Sylvia et al. 2005).  
447 Theoretically, dung beetles are capable of similarly affecting GHGs, but lacked supportive  
448 research (see *Introduction*). By improving the power of our study (combined-years design) and  
449 testing potential methodological problems (unmixed design), we suggest that dung beetles are  
450 ultimately carbon neutral and that the physical ‘mixing’ of dung may not be a significant  
451 mechanism in reducing GHGs.

452

## 453 **GHG trends and their potential causes**

454 As the pat ages, the constant decay physically alters the dung by leaching/evaporating water (by  
455 1.89x from 0-14d, Supp. Table D6) and loosening the dung structure – a process aided by the  
456 disturbance and disassembly of dung pats by dung beetles (Fig 2). The disintegrating and  
457 desiccating dung allows for deeper oxygen (O<sub>2</sub>) penetration and permeation such as seen in soil  
458 (Sylvia et al. 2005). If true, we would predict decreased CH<sub>4</sub>, increased N<sub>2</sub>O, and increased CO<sub>2</sub>  
459 over time. However, we saw both dung-based CH<sub>4</sub> and CO<sub>2</sub> (and so CO<sub>2</sub>e) decline permanently  
460 over time until they mirrored the vegetative-control fluxes (Fig 6). Though expected for CH<sub>4</sub>,  
461 CO<sub>2</sub>'s decline was a surprise. Presumably transitioning from an anaerobic to an aerobic dung pat  
462 by mixing or aging should predictably increase CO<sub>2</sub> emissions via environmental respiration or  
463 enhanced gas transport, though not dung beetle respiration (Iwasa et al. 2015). After all, we  
464 (Supp. Section B) and Piccini et al. (2017) showed that dung beetle respiration was less <1.5% of  
465 the total CO<sub>2</sub>, and that dung beetles did not release more CH<sub>4</sub> and N<sub>2</sub>O than the control (Supp.  
466 Fig B), despite consuming methanogen and denitrifier-rich dung (Yokoyama et al. 1991a).



467 Ultimately, no CO<sub>2</sub> differences existed between any treatments (Fig 3) even after two weeks of  
468 decomposition and desiccation (Fig 2). Meanwhile, N<sub>2</sub>O followed our predictions but offered a  
469 surprise.

470

471 Generally, N<sub>2</sub>O emissions result from incomplete byproducts of denitrification (Sylvia et al.  
472 2005), nitrate reduction (Penttilä et al. 2013, Slade et al. 2016a, Piccini et al. 2017), nitrification  
473 (Iwasa et al. 2015), from increased microbial abundance and activity (Yokoyama et al. 1991ab),  
474 and/or increased gas transport – such as when dung beetles microtunnel into wet dung (Evans et  
475 al. 2019). However, the greatest (>90%) N<sub>2</sub>O production is formed by incomplete denitrification,  
476 when:

477

478 1) there is sufficient O<sub>2</sub>-disrupting amounts – too little O<sub>2</sub> forms the benign, atmospheric N<sub>2</sub>; too  
479 much O<sub>2</sub> forms the pre-GHG cursor, NO<sub>x</sub>; and just the right amount forms N<sub>2</sub>O due to  
480 oxygen-inhibited microbial enzymes (Sylvia et al. 2005). O<sub>2</sub> competes with water to fill soil  
481 pores, and so a substrate's moisture can inhibit aeration – hence why N<sub>2</sub>O emissions spike  
482 after rainfall (Sylvia et al. 2005);

483

484 2) there are large NO<sub>3</sub><sup>-</sup> pools (akin to synthetic nitrate fertilizers – Akiyama et al. 2010) that  
485 microbes use to produce N<sub>2</sub>O. Dung beetle activity provide NO<sub>3</sub><sup>-</sup> pools by enhancing  
486 ammonification and nitrification through aerobic soil activity (Yokoyama et al. 1991b).

487 Collectively this suggests that cow dung is an obvious moisture and fertilizer source, and that  
488 dung beetles may increase the incomplete denitrification rate.

489

490 The increased  $N_2O$  fluxes from 1-7d and the sharp 14d decline in dung-based treatments suggest  
491 that our treatments supported large enough N-pools and a mostly anaerobic state sufficient for  
492  $N_2O$  production until 14d. However, we wondered if dung or soil was the main source of  
493 denitrifier activity. Consider that: higher soil moisture, but not dung moisture (Supp. Fig G9),  
494 predicted higher  $N_2O$  emissions (Supp. Fig G10) despite dung and soil moisture content being  
495 correlated ( $r=0.36$  to  $0.64$  depending on the gas, Supp. Table D8). This suggests that dung  
496 leaches moisture and resource-rich fluids to the surrounding soil and so soil microbes may be  
497 generating  $N_2O$ . In support, research shows that both C and N-based water-soluble nutrients  
498 increased with dung-presence (Yokoyama et al. 1991a, Evans et al. 2019) and all soil-based, N-  
499 acting bacterial and fungal groups (Yokoyama et al. 1991a) increased in dung-containing groups.  
500 Thus, soil microbes possess all the necessary prerequisites for  $N_2O$  generation. We also see that  
501 dung-only treatments possessed higher soil and dung moisture contents (Supp. Table D6)  
502 resulting in treatments growing moisture-loving white fungus or mushrooms, but curiously also  
503 had lower  $N_2O$  fluxes than the tunneler-containing groups that sported lower dung soil moisture  
504 contents (Supp. Table D6). Combined, this suggests that though tunneler burial activity  
505 decreases dung and soil moisture through churning – the soil disturbance, dung incorporation,  
506 and aeration likely generate more  $N_2O$  than dung-presence alone.

507

508 In short, we suggest the higher  $N_2O$  generation associated with dung-presence is likely due to  
509 soil-generation. The dung provides the fertilizer, the moisture or rain leach the dung-rich  
510 resources, and any additional soil churning, particularly by the burial-heavy tunneler groups,  
511 aerate and trap dung-resources for greater microbial consumption. After all, dung beetles  
512 increase C, N, and other soil analytes (Nichols et al. 2008), and although resource-deposition

513 does not necessarily coincide with exact GHG production dates (Evans et al. 2019), these  
514 materials likely remain available until microbial-digestion conditions are ideal. Altogether, dung-  
515 presence, increased soil moisture, and tunneler-presence each increased soil-based  $N_2O$  fluxes.  
516 These processes mirror common  $N_2O$  spiking agriculture practices such as: applied fertilizers  
517 (Akiyama et al. 2010), rain-filled soils (Sylvia et al. 2005), farmer pre-rain fertilizer applications  
518 (Singh and Sekhon 1979), churning compost (Lim et al. 2016), and tilling soils (Snyder and  
519 Hendrix 2008).

520

## 521 **Comparing Dung Beetle Activity**

522 Through a literature review, we sought to uncover if the dung beetle effect was consistent despite  
523 a diversity of methods, environmental conditions, sample sizes, treatments, dung beetle  
524 activity/biomass, and statistical focuses (Table 4).

525

526 *Methane*. Of our combined studies: 3/7's presumed dung beetles decreased  $CH_4$  over time  
527 because of aeration, 3/7's showed no effect, and 1/7th presumed dung beetles increased  $CH_4$   
528 when they created alternative gas pathways (microtunnels) in wet dung. Periodic  $CH_4$  increases  
529 are not uncommon (Penttilä et al. 2013, Slade et al. 2016a, Evans et al. 2019) and highly suggest  
530 methanogen-preferred anaerobic conditions attributed to wet conditions. Thus, as pats dried,  
531 most studies showed extinguished  $CH_4$  fluxes by 7d (Piccini et al. 2017, Fowler et al. 2020c) or  
532 30d (Penttilä et al. 2013, Slade et al. 2016a). Even Evan's et al. (2019)'s study showed decreased  
533 dung-generated  $CH_4$  relative to the pasture-only by 7d despite the meadow being a strong  $CH_4$   
534 sink.

535

536 *Carbon dioxide*. Of our combined studies: 1/7th presumed dung beetles increased  $\text{CO}_2$  flux from  
537 either dung-beetle respiration (Iwasa et al. 2015) or enhanced gas transport on particular days  
538 (Evans et al. 2019), while 6/7's showed no effect (Table 4). Interestingly all dung-only controls  
539 followed negative distributions (linear, exponential, Gaussian) for  $\text{CO}_2$  over time – suggesting  
540 decreased biological respiration is very common unless enhanced by other factors (e.g. dung  
541 beetles; Iwasa et al. 2015, Evans et al. 2019).

542

543 *Nitrous oxide*. Of our combined studies: 4/7's of studies showed no dung beetle effect (including  
544 ours, though we showed a median increase), while 3/7's showed large  $\text{N}_2\text{O}$  increases based on  
545 numerous explanations. Like  $\text{CH}_4$ , most dung-containing treatments saw periodic increases,  
546 except for Piccini et al. (2017). This suggests that dung-presence and dung-beetle presence can  
547 spike  $\text{N}_2\text{O}$  fluxes. Interestingly, in every study where  $\text{CH}_4$  was significantly influenced, so was  
548  $\text{N}_2\text{O}$ .

549

550 Despite this information, time is the strongest predictor in all studies and consistently decreased  
551  $\text{CH}_4$  and  $\text{CO}_2$ 's emissions and increased  $\text{N}_2\text{O}$ 's emissions (Table 3).

**Table 3.** A summary of reported GHG flux differences (+: increase, -: decrease, 0: no effect) and their overall trajectory surrounding aggregate time effects of ANOVAs ( $p < 0.05$ ) of the dung-containing treatments (DC), or on the dung-only treatments (DO).

| Article                            | Group | Time (d) <sup>a</sup> | CH <sub>4</sub> |       | CO <sub>2</sub> |       | N <sub>2</sub> O |       | CO <sub>2</sub> e                  |
|------------------------------------|-------|-----------------------|-----------------|-------|-----------------|-------|------------------|-------|------------------------------------|
|                                    |       |                       | Flux            | Traj. | Flux            | Traj. | Flux             | Traj. |                                    |
| Penttilä et al. 2013 <sup>§</sup>  | DO    | 50                    | >-100x          | +BC   | -2.8x           | -L    | ~1x              | +G    | Follows CO <sub>2</sub> trajectory |
| Iwasa et al. 2015 <sup>¥</sup>     | DO    | 6                     | -2x             | -L    | -5x             | -L    | +2x              | -BC   |                                    |
| Slade et al. (2016ab) <sup>§</sup> | DC    | 60,60                 | >-1000x         | +BC   | -10.67          | +BC   | +5x              | +G    |                                    |
| Hammer et al. 2016                 | DO    | 43                    | -               |       | -               |       | -                |       |                                    |
| Piccini et al. 2017 <sup>¥</sup>   | DC    | 32                    | >-25x           | -L    | -3x             | -E    | >-13x            | -E    |                                    |
| Evans et al. 2019 <sup>¥</sup>     | DO    | 56                    | ~1x             | A     | -1.36x          | -BC   | -2.5x            | S     |                                    |
| Fowler et al. 2020c <sup>¥</sup>   | DC    | 7,14                  | >-200x          | -L    | >-2x            | -L    | +1.25x           | +E    |                                    |

BC, Skewed Bell Curve; L, Linear; G, Gaussian; E, Exponential; S, Sine; A, Alternating.

<sup>a</sup> Calculated difference of groups that represent the ratio of the means of (Day 0)/(DayX), where DayX=Time (d) reported here.

<sup>§</sup> Statistical tests not reported in the published paper thus ‘significant’ differences based on visual means and standard errors as shown in graphs.

<sup>¥</sup> Omnibus ANOVA’s reported ( $p < 0.05$ ).

553 In our study, CH<sub>4</sub>, CO<sub>2</sub>, and CO<sub>2</sub>e explained 84%, 72%, and 79% of the total variation (8-10x the  
554 variation explained by treatment alone). Only for N<sub>2</sub>O did the time:treatment interaction fit 1.64x  
555 more variation than either variable alone, explaining a total of 17% variation. This suggests that  
556 time, rather than treatment, affects the interaction effect most strongly (except in the case of  
557 N<sub>2</sub>O) which explains why dung beetles in our study affected only one out of five sampling days  
558 (Fig 5) – a miniscule effect. It is likely that time may possess such a strong effect because it is  
559 multicollinear: other variables such as dung moisture, soil moisture, decay, and other unknown  
560 time-related variables drastically and simultaneously change (Supp. Table D8) as the pat ages  
561 (Fig 2). However, by comparing dung beetle treatments to time, we can more easily deduce if  
562 dung beetle activity, despite all other pressures, is a more powerful GHG predictor – it wasn't.  
563 We also hypothesized that premixing dung, an activity reflecting dung beetle activity, might  
564 obscure the dung beetle effect – it didn't.

565

566 **Mixing the Message.** While the unmixed dung-only saw minor increases in CH<sub>4</sub>, N<sub>2</sub>O, and  
567 CO<sub>2</sub>e relative to the mixed dung-only (Figs 5 and 6), these differences did not affect aggregate  
568 fluxes (Fig 3) nor did they compare to time's strong effects (Fig 4). In fact, Evans et al. (2019)'s  
569 suggestion that dung tunnels may increase CH<sub>4</sub>'s release from the pat applies only to dung wet  
570 enough for anaerobic maintenance, but chunky/dry enough to support sturdy microtunnels. When  
571 mixing fresh dung, the dung reforms and reconnects when wet, so likely there was no aeration in  
572 the mixed dung-only without O<sub>2</sub> for confirmation. At the outset we hypothesized that mixing  
573 multiple dung pats and relocating them alters GHGs, but this was not borne out – however, it  
574 does question whether mixing itself (Table 4) is an influential factor, especially compared to  
575 time-based decay (Table 3).

**Table 4.** A summary of reported GHG differences (+: increase, -: decrease, 0: no effect) focused on aggregate treatment effects of t-tests and ANOVAs ( $p < 0.05$ ) that exclude strong and effect-masking predictors such as time or vegetation.

| Article                            | $n_{\text{dung}}/d$ | Abundance                      | Biomass (g)                   | Dung           | CH <sub>4</sub> | CO <sub>2</sub> | N <sub>2</sub> O | CO <sub>2</sub> e |
|------------------------------------|---------------------|--------------------------------|-------------------------------|----------------|-----------------|-----------------|------------------|-------------------|
| Yokoyama et al. 1991ab             | 2-3                 | T: 4                           | -                             | 100g (~.097l)  | -               | -               | +1.93x           | -                 |
| Penttilä et al. 2013               | 10                  | D: 153                         | 1.29                          | 1.2l           | -1.65x          | 0               | +27.2x           | 0                 |
| Iwasa et al. 2015 <sup>§</sup>     | 3                   | T: 30                          | -                             | 1l             | -2.61x          | +7.87x          | +10.81x          | +1.91x            |
| Slade et al. (2016ab) <sup>§</sup> | 30,20*              | -                              | -                             | 1.2l           | 0               | 0 <sup>□</sup>  | 0                | 0                 |
| Hammer et al. 2016                 | 10 <sup>†</sup>     | D: 12                          | -                             | 1l             | -1.59x          | 0               | +3.02x           | 0 <sup>§</sup>    |
| Piccini et al. 2017 <sup>¥</sup>   | 8                   | T: 2-13<br>D: 11-31<br>R: 2-6  | T: 0.40<br>D: 0.31<br>R: 0.30 | 300g (~.27l)   | 0 <sup>A</sup>  | 0 <sup>B</sup>  | 0 <sup>C</sup>   | 0 <sup>D</sup>    |
| Evans et al. 2019                  | 32                  | 1-24                           | -                             | 1.5l           | +3x             | 0               | +3x              | 0                 |
| Fowler et al. 2020c                | 24                  | T: 41<br>T/D: 21/249<br>D: 498 | 3                             | 1,000g (~.97l) | 0               | 0               | 0                | 0                 |

- 
- Based on Fig A2 from Slade et al. 2016b, all other GHGs come from Slade et al. 2016a's Supplemental Materials
  - † Considering only the non-antibiotic dung to avoid confounding effects
  - \* Numbers represent dung beetle treatments, dung-only was n=3 for both 2016a and b
  - § Traditional t-test not reported in the published paper. Based on reported and overlapping SE values or a t-test was performed on the available raw data (Supp. Table D7)
  - ¥ Based only on the reported p-adj. value (Family-Wise Error Corrected)
  - A 5 of 6 dung beetle treatment reported no difference, 1 trt increased CH<sub>4</sub> emissions (T4)
  - B 5 of 6 dung beetle treatments reported no difference, 1 trt decreased CO<sub>2</sub> emissions (T4)
  - C 6 of 6 dung beetle treatments reported no difference for N<sub>2</sub>O
  - D 5 of 6 dung beetle treatments reported no difference, 1 trt decreased CO<sub>2</sub>e emissions (T6)
-



577 Thus, studying dung beetle populations that can accelerate dung decay faster than time alone  
578 may answer what behavior(s) strongly alter GHG pathways. Varying dung beetle abundances in  
579 future studies may answer this question.

580

## 581 Conclusion

582 Our major findings revealed that: 1) dung-presence always increased GHG ( $\text{CH}_4$ ,  $\text{CO}_2$ ,  $\text{N}_2\text{O}$ )  
583 production relative to vegetation-only – likely because the sudden deposition of a rich and  
584 readily available nitrogen, carbon, and mineral source (fertilization) sparked microbial activity in  
585 the form of gases; 2) that time was the single strongest predictor of GHG trends for reducing  
586  $\text{CH}_4$ ,  $\text{CO}_2$ , and  $\text{CO}_2\text{e}$ , and steadily increasing  $\text{N}_2\text{O}$  over time with the potential help of burial  
587 activity. These trends may generally be explained by decreased dung moisture, increased soil  
588 moisture, and/or dung beetle tunneling behavior that exposes dung to greater oxygenic/microbial  
589 consumptive conditions; and 3) that neither physically mixing nor dung beetle activity, when  
590 compared with time or in aggregate, affected the total greenhouse gas effect ( $\text{CO}_2\text{e}$ ) in a practical  
591 manner, though dung beetles periodically decreased  $\text{CH}_4$  and increased  $\text{N}_2\text{O}$ . Thus, while dung  
592 beetles occasionally influenced individual GHGs in small ways (Table 4), dung-presence and  
593 time was a much stronger predictor (Table 3), and thus forces researchers to ask: what kind of  
594 impact would we want to see from dung beetles? Future research may help answer whether dung  
595 beetles have no GHG effect or if an effect is only observed at greater abundances and activities  
596 than currently seen.

597

## 598 **Acknowledgements**

599 Thank you, Amelia Weaver and Tashiana Wilcox for assisting with field experiments and beetle  
600 capture. We appreciate Cong Tu for conveying the basic concepts of GHG collection and  
601 measurement, as well as the NCSU Lake Wheeler Road Field Lab for collaborating with us on  
602 cattle pasture use. Lastly, we appreciate the crucial edits and thoughts of Meredith Spence  
603 Beaulieu and Bradley Mullens in the drafting of this manuscript.

604

605 This material is based upon work supported by the National Science Foundation Graduate  
606 Research Fellowship Program under Grant No. (DGE-1746939). Any opinions, findings, and  
607 conclusions or recommendations expressed in this material are those of the author(s) and do not  
608 necessarily reflect the views of the National Science Foundation. This research was also  
609 supported by the Center for Environmental Farming Systems Graduate Student Fellowship at  
610 North Carolina State University.

611

612

613

## 615 **References**

- 616 Akiyama H, Yan X, and Yagi K. Evaluation of effectiveness of enhanced-efficiency  
617 fertilizers as mitigation options for N<sub>2</sub>O and NO emissions from agricultural soils: meta  
618 analysis. *Global Change Biol.* 2010; 16:1837-1846.
- 619
- 620 Bertone M, Green J, Washburn S, Poore M, Sorenson C, and Watson DW. Seasonal activity and  
621 species composition of dung beetles (Coleoptera: Scarabaeidae and Geotrupidae) inhabiting  
622 cattle pastures in North Carolina. *Ann. Entomol. Soc. Am.* 2005; 98:309-321.
- 623
- 624 Bertone M, Watson W, Stringham M, Green J, Washburn S, Poore M, et al. Dung beetles of  
625 central and eastern North Carolina cattle pastures. North Carolina Cooperative Extension, North  
626 Carolina State University, Raleigh, NC; 2014.
- 627
- 628 Casler MD. Fundamentals of experimental design: Guidelines for designing successful  
629 experiments. 2015; *Agron. J.* 107:692-705.
- 630
- 631 Colquhoun D. An investigation of the false discovery rate and the misinterpretation of p-values.  
632 2016; *Royal Society open science* 1:140216.
- 633
- 634 Davies GM, and Gray A. Don't let spurious accusations of pseudoreplication limit our ability to  
635 learn from natural experiments (and other messy kinds of ecological monitoring). 2015; *Ecology*  
636 *and Evolution* 5:5295-5304.

637 Doube BM. Ecosystem services provided by dung beetles in Australia. 2018; Basic Appl. Ecol.  
638 26:35-49.

639

640 Erceg-Hurn DM, and Mirosevich VM. Modern robust statistical methods: an easy way to  
641 maximize the accuracy and power of your research. 2008; Am. Psychol. 63:591.

642

643 Evans KS, Mamo M, Wingeyer A, Schacht WH, Eskridge KM, Bradshaw J, et al. Dung Beetles  
644 Increase Greenhouse Gas Fluxes from Dung Pats in a North Temperate Grassland. 2019; J.  
645 Environ. Qual. 48:537-548.

646

647 Fowler F, Wilcox S, Nuss S, and Watson W. Sampling Efficacy and Survival Rates of *Labarrus*  
648 *pseudolividus* (Coleoptera: Scarabaeidae) and *Onthophagus taurus* (Coleoptera:  
649 Scarabaeidae) Using Flotation and Sieve-Separation Methodology. 2020a; J. Insect Sci.  
650 20:6.

651

652 Fowler F, Denning S, and Watson W. “Chapter 2: Gases on the Go: Mobile Chamber Designs  
653 and Gas Techniques for Field Research” in How Dung Beetles affect Dung-Generated  
654 Greenhouse Gases in Cattle Pastures: Experimental Studies and Literature Review. PhD  
655 Dissertation, North Carolina State University, Raleigh. 2020b. Available from:  
656 <https://repository.lib.ncsu.edu/bitstream/handle/1840.20/37418/etd.pdf?sequence=1>

657

658 Hammer TJ., Fierer N, Hardwick B, Simojoki A, Slade E, Taponen J, et al. Treating cattle with  
659 antibiotics affects greenhouse gas emissions, and microbiota in dung and dung beetles.  
660 2016a; Proc.R.Soc.B 283:20160150.  
661

662 Hammer TJ., Fierer N, Hardwick B, Simojoki A, Slade E, Taponen J, et al. *Dataset* for: Treating  
663 cattle with antibiotics affects greenhouse gas emissions, and microbiota in dung and dung  
664 beetles. 2016b; Proc.R.Soc.B: 283:20160150.  
665

666 Hanski I, and Cambefort Y. Dung beetle ecology. Vol. 1195. Princeton University Press; 2014.  
667

668 IPCC. Climate Change 2007: Synthesis Report. Contribution of Working Groups I, II and III to  
669 the Fourth Assessment Report of the Intergovernmental Panel on Climate Change Geneva,  
670 Switzerland. 2007 April 10 [Cited 2020 November 15]. Available from:  
671 <https://www.ipcc.ch/report/ar4/syr/>  
672

673 Iwasa M, Moki Y, and Takahashi J. Effects of the activity of coprophagous insects on  
674 greenhouse gas emissions from cattle dung pats and changes in amounts of nitrogen, carbon,  
675 and energy. 2015; Environ. Entomol. 44:106-113.  
676

677 Lim SL, Lee LH, and Wu TY. Sustainability of using composting and vermicomposting  
678 technologies for organic solid waste biotransformation: recent overview, greenhouse gases  
679 emissions and economic analysis. 2016; J. Clean. Prod. 111:262-278.  
680

- 681 Lubbers IM., Van Groenigen KJ, Fonte SJ, Six J, Brussaard L, and Van JW Groenigen.  
682 Greenhouse-gas emissions from soils increased by earthworms. 2013; *Nature Climate*  
683 *Change* 3:187.  
684
- 685 Nichols E., Spector S, Louzada J, Larsen T, Amezquita S, and Favila ME. Ecological functions  
686 and ecosystem services provided by Scarabaeinae dung beetles. 2008; *Biol. Conserv.*  
687 141:1461-1474.  
688
- 689 Penttilä A., Slade EM, Simojoki A, Riutta T, Minkkinen K, and Roslin T. Quantifying beetle-  
690 mediated effects on gas fluxes from dung pats. 2013; *PLoS One* 8:e71454.  
691
- 692 Piccini I, Arnieri F, Caprio E, Nervo B, Pelissetti S, Palestrini C, et al. Greenhouse gas emissions  
693 from dung pats vary with dung beetle species and with assemblage composition. 2017; *PloS*  
694 *one* 12:e0178077.  
695
- 696 Singh B, and Sekhon GS. Nitrate pollution of groundwater from farm use of nitrogen  
697 fertilizers—a review. 1979; *Agriculture and Environment* 4:207-225.  
698
- 699 Skidmore ST, and Thompson B. Bias and precision of some classical ANOVA effect sizes when  
700 assumptions are violated. 2013; *Behavior research methods* 45:536-546.  
701
- 702 Slade EM, Riutta T, Roslin T, and Tuomisto HL. The role of dung beetles in reducing  
703 greenhouse gas emissions from cattle farming. 2016a; *Scientific reports* 6:18140.

704

705 Slade EM, Roslin T, Santalahti M, and Bell T. Disentangling the ‘brown world’ faecal–detritus  
706 interaction web: dung beetle effects on soil microbial properties. 2016b; *Oikos* 125:629-635.

707

708 Snyder CS, Bruulsema TW, Jensen TL, and Fixen PE. Review of greenhouse gas emissions from  
709 crop production systems and fertilizer management effects. 2009; *Agric. Ecosyst. Environ.*  
710 133:247-266.

711

712 Steinfeld H, Gerber P, Wassenaar TD, Castel V, M. Rosales, and de Haan C. Livestock's long  
713 shadow: environmental issues and options. 2006; Food & Agriculture Org.

714

715 Sugimoto A, Bignell DE, and MacDonald JA. Global impact of termites on the carbon cycle and  
716 atmospheric trace gases. In *Termites: evolution, sociality, symbioses, ecology*. Springer.  
717 2000; pp. 409-435

718

719 Sylvia DM, Fuhrmann JJ, Hartel PG, and Zuberer DA. Principles and applications of soil  
720 microbiology. Pearson Prentice Hall Upper Saddle River, NJ; 2005.

721

722 Venterea RT., and Parkin TB. Quantifying biases in non-steady state chamber measurements of  
723 soil-atmosphere gas exchange. *Managing agricultural greenhouse gases*. Elsevier, Boston.  
724 2012; pp. 327-343.

725

726 Wilcox R. Introduction to Robust Estimation and Hypothesis Testing. 3rd ed. Elsevier Science;  
727 2013.

728

729 Yokoyama K, Kai H, Koga T, and Aibe T. Nitrogen mineralization and microbial populations in  
730 cow dung, dung balls and underlying soil affected by paracoprid dung beetles. 1991a; Soil  
731 Biol. Biochem. 23:649-653.

732

733 Yokoyama K, Kai H, and Tsuchiyama H. Paracoprid dung beetles and gaseous loss of nitrogen  
734 from cow dung. 1991b; Soil Biol. Biochem. 23:643-647.

735

736

## 737 **Acknowledgements**

738 S1 File. Supplementary Materials.

739

740

741

742

743

744

745



## Standard Site

## Pasture Site

Treatment Layout

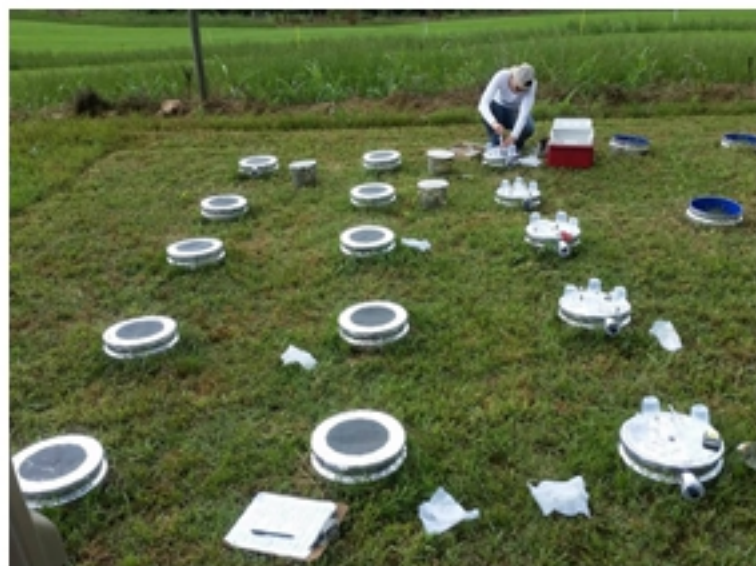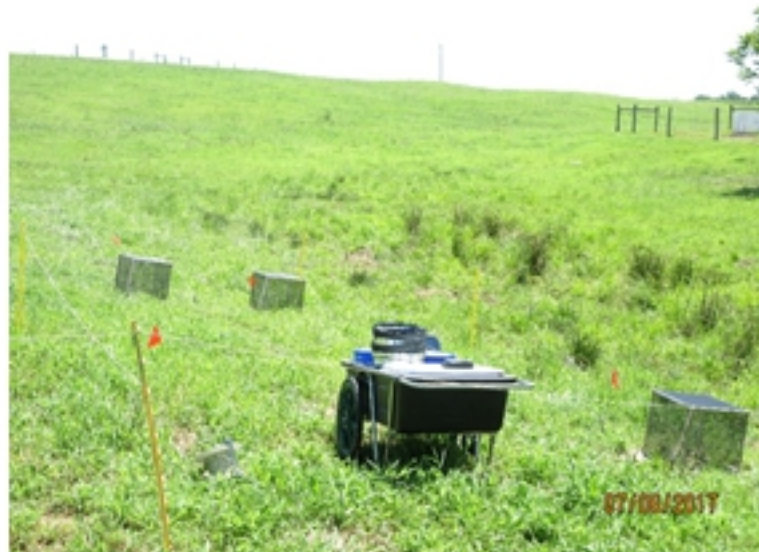

Chamber Placement

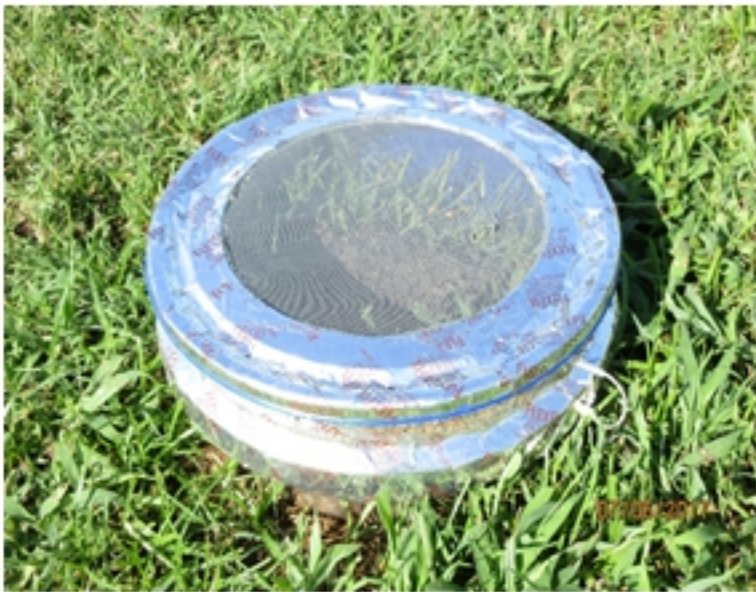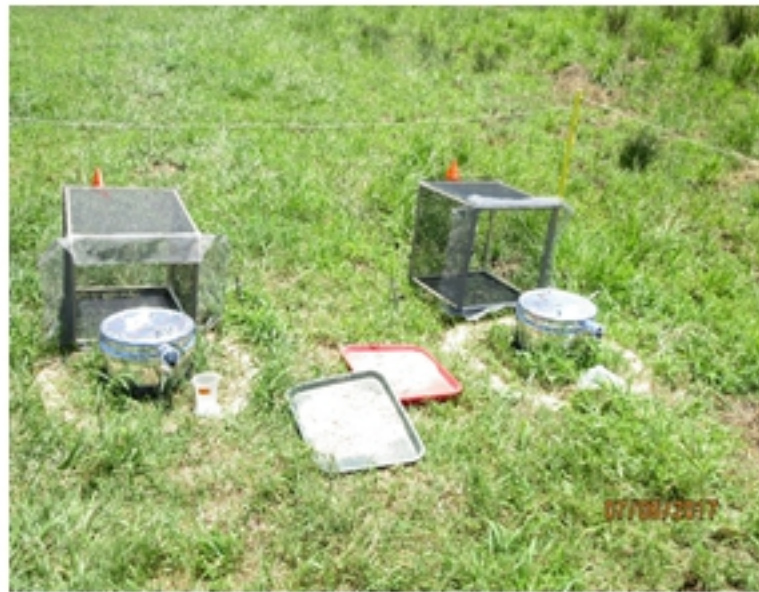

Fig 1



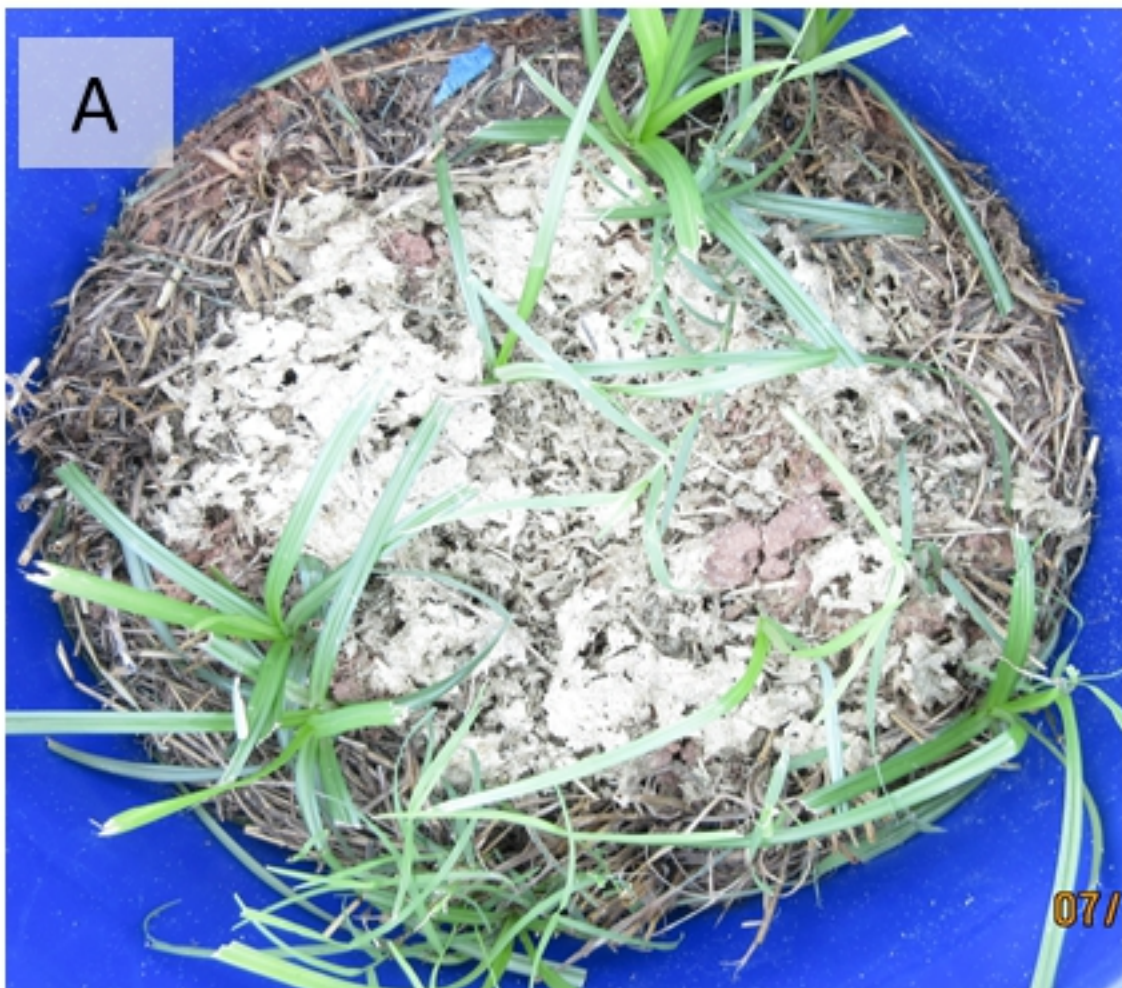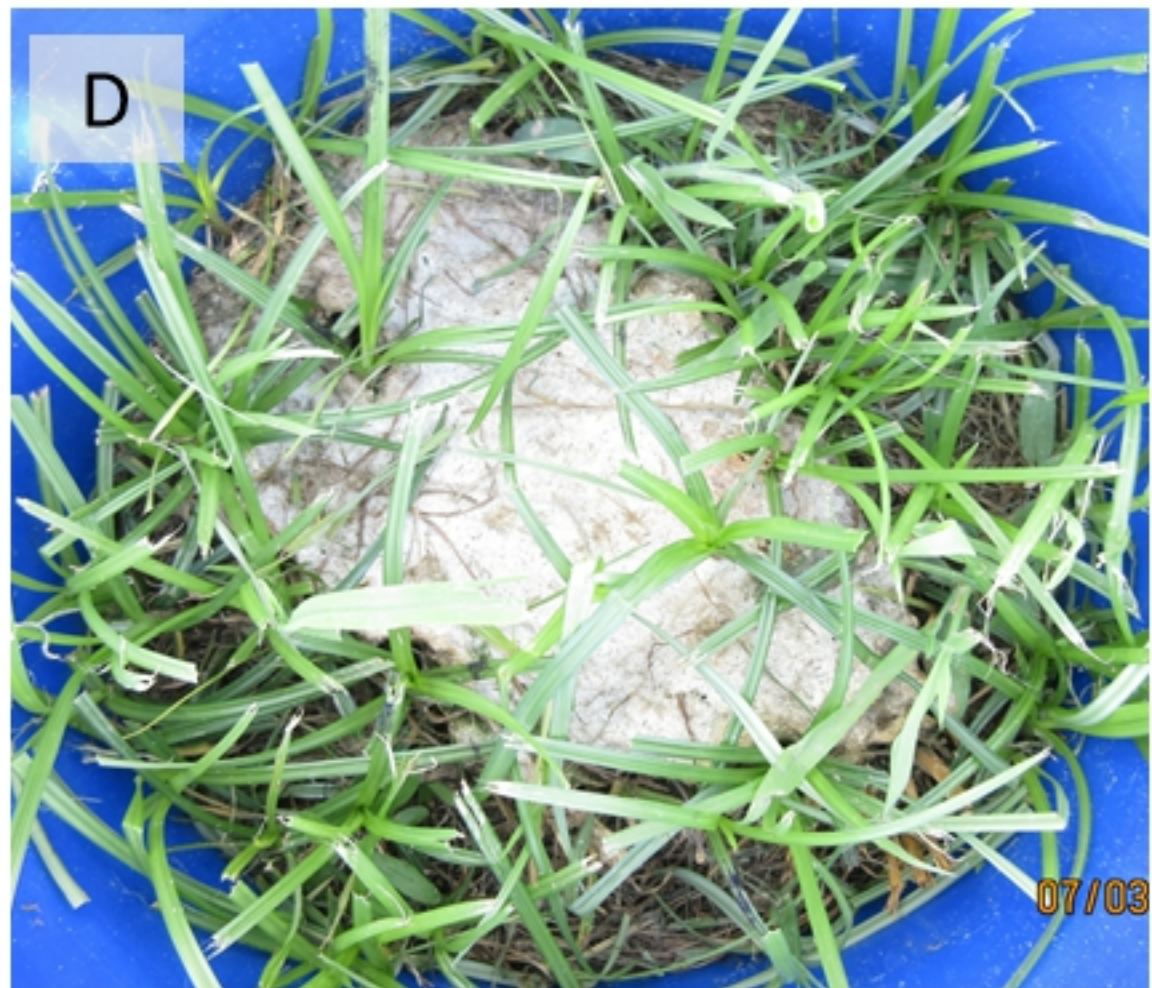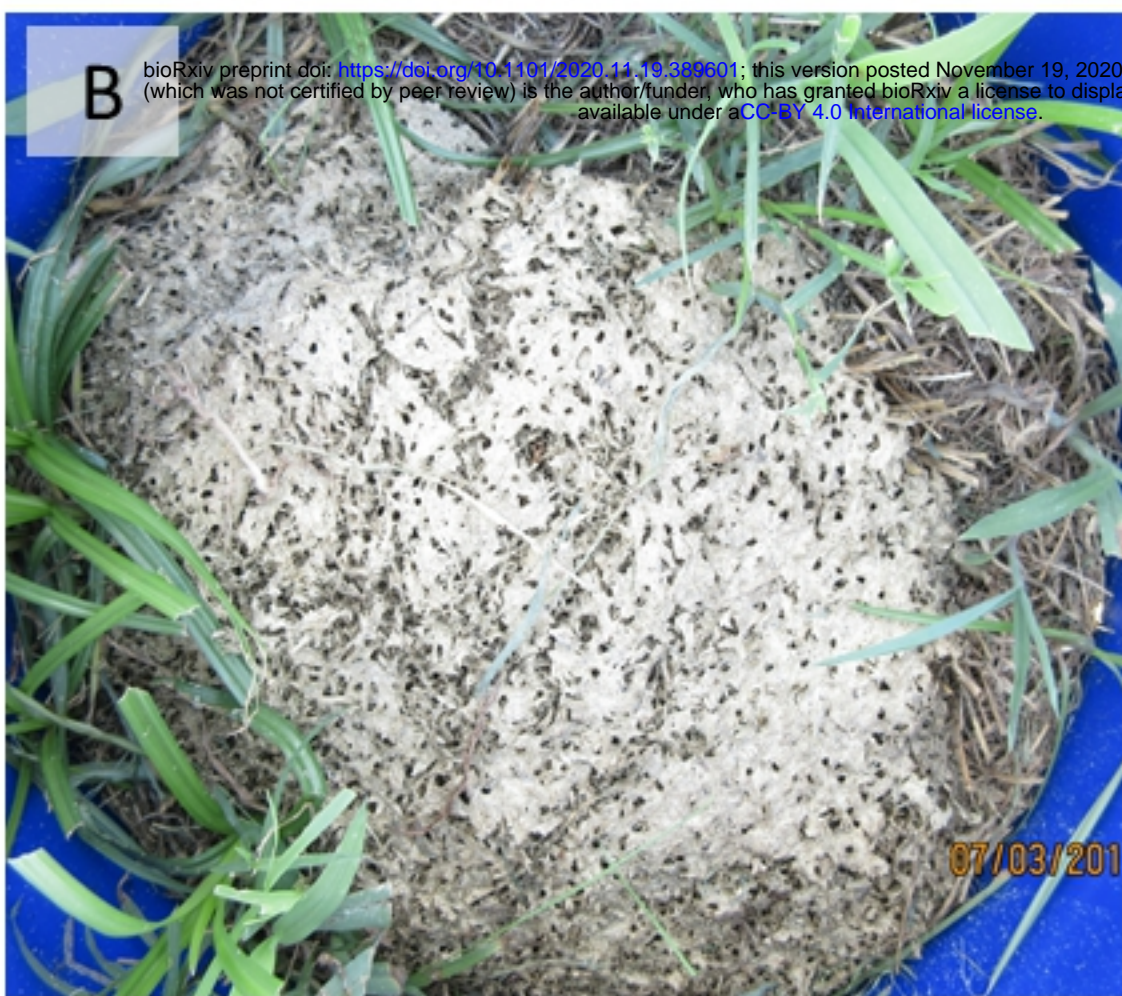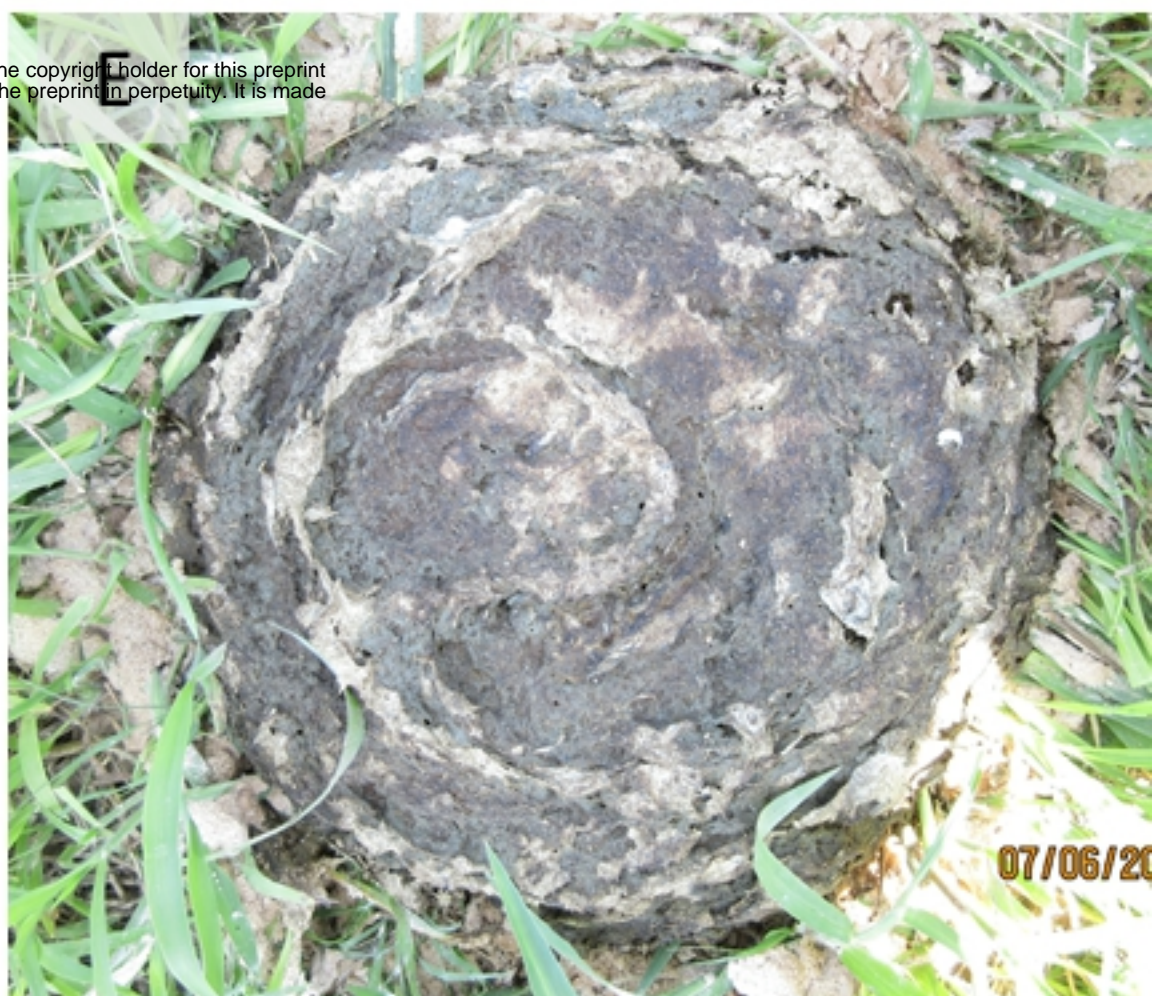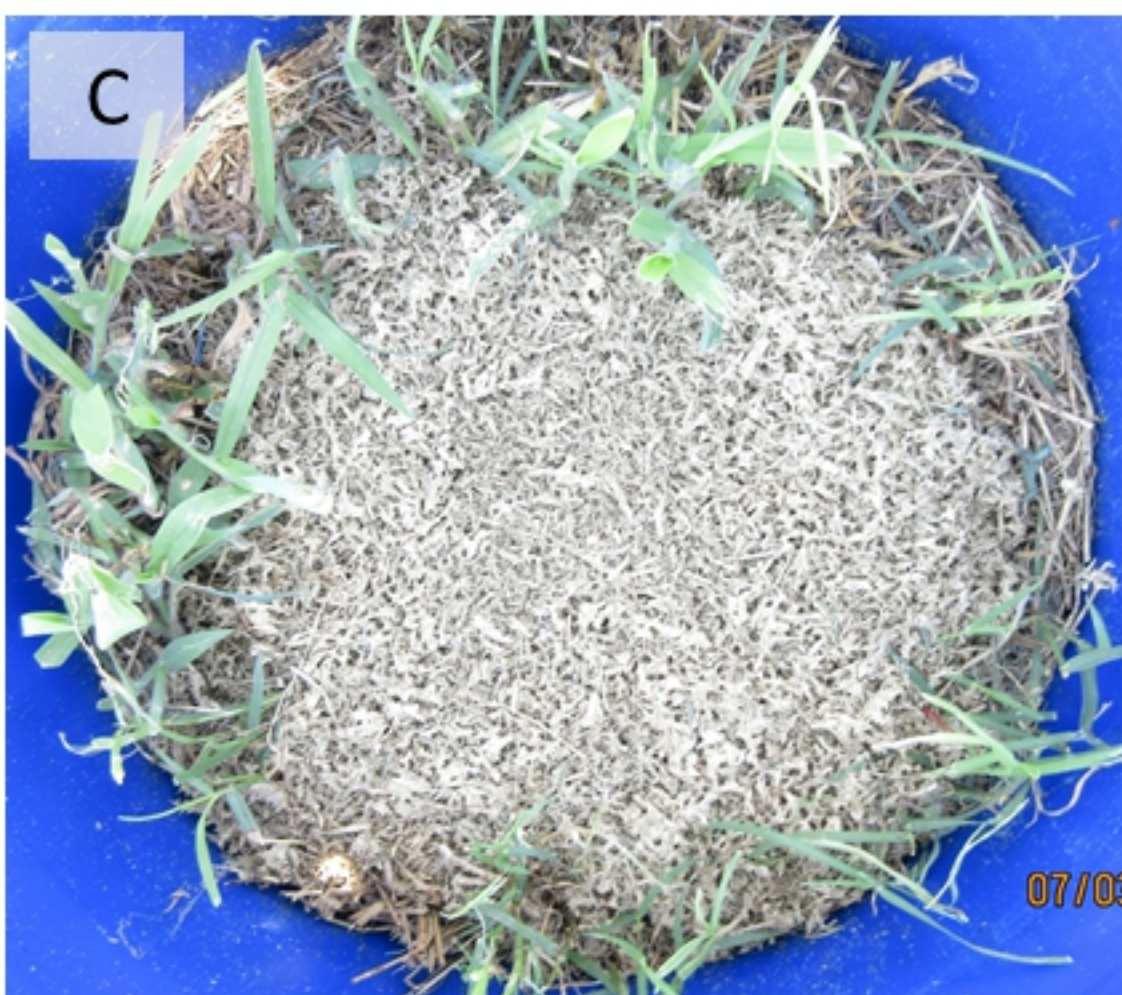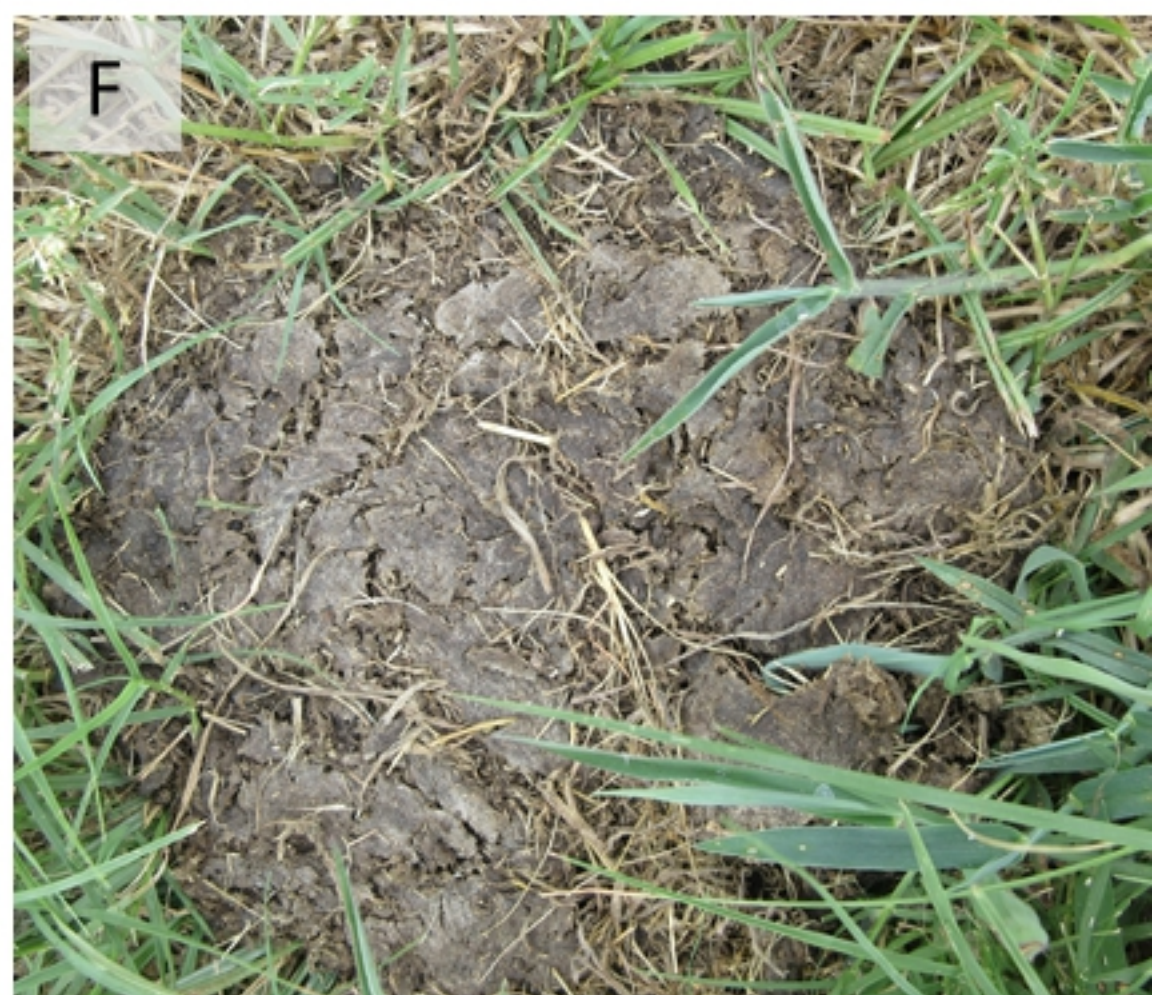

Fig 2

bioRxiv preprint doi: <https://doi.org/10.1101/2020.11.19.389601>; this version posted November 19, 2020. The copyright holder for this preprint (which was not certified by peer review) is the author/funder, who has granted bioRxiv a license to display the preprint in perpetuity. It is made available under aCC-BY 4.0 International license.



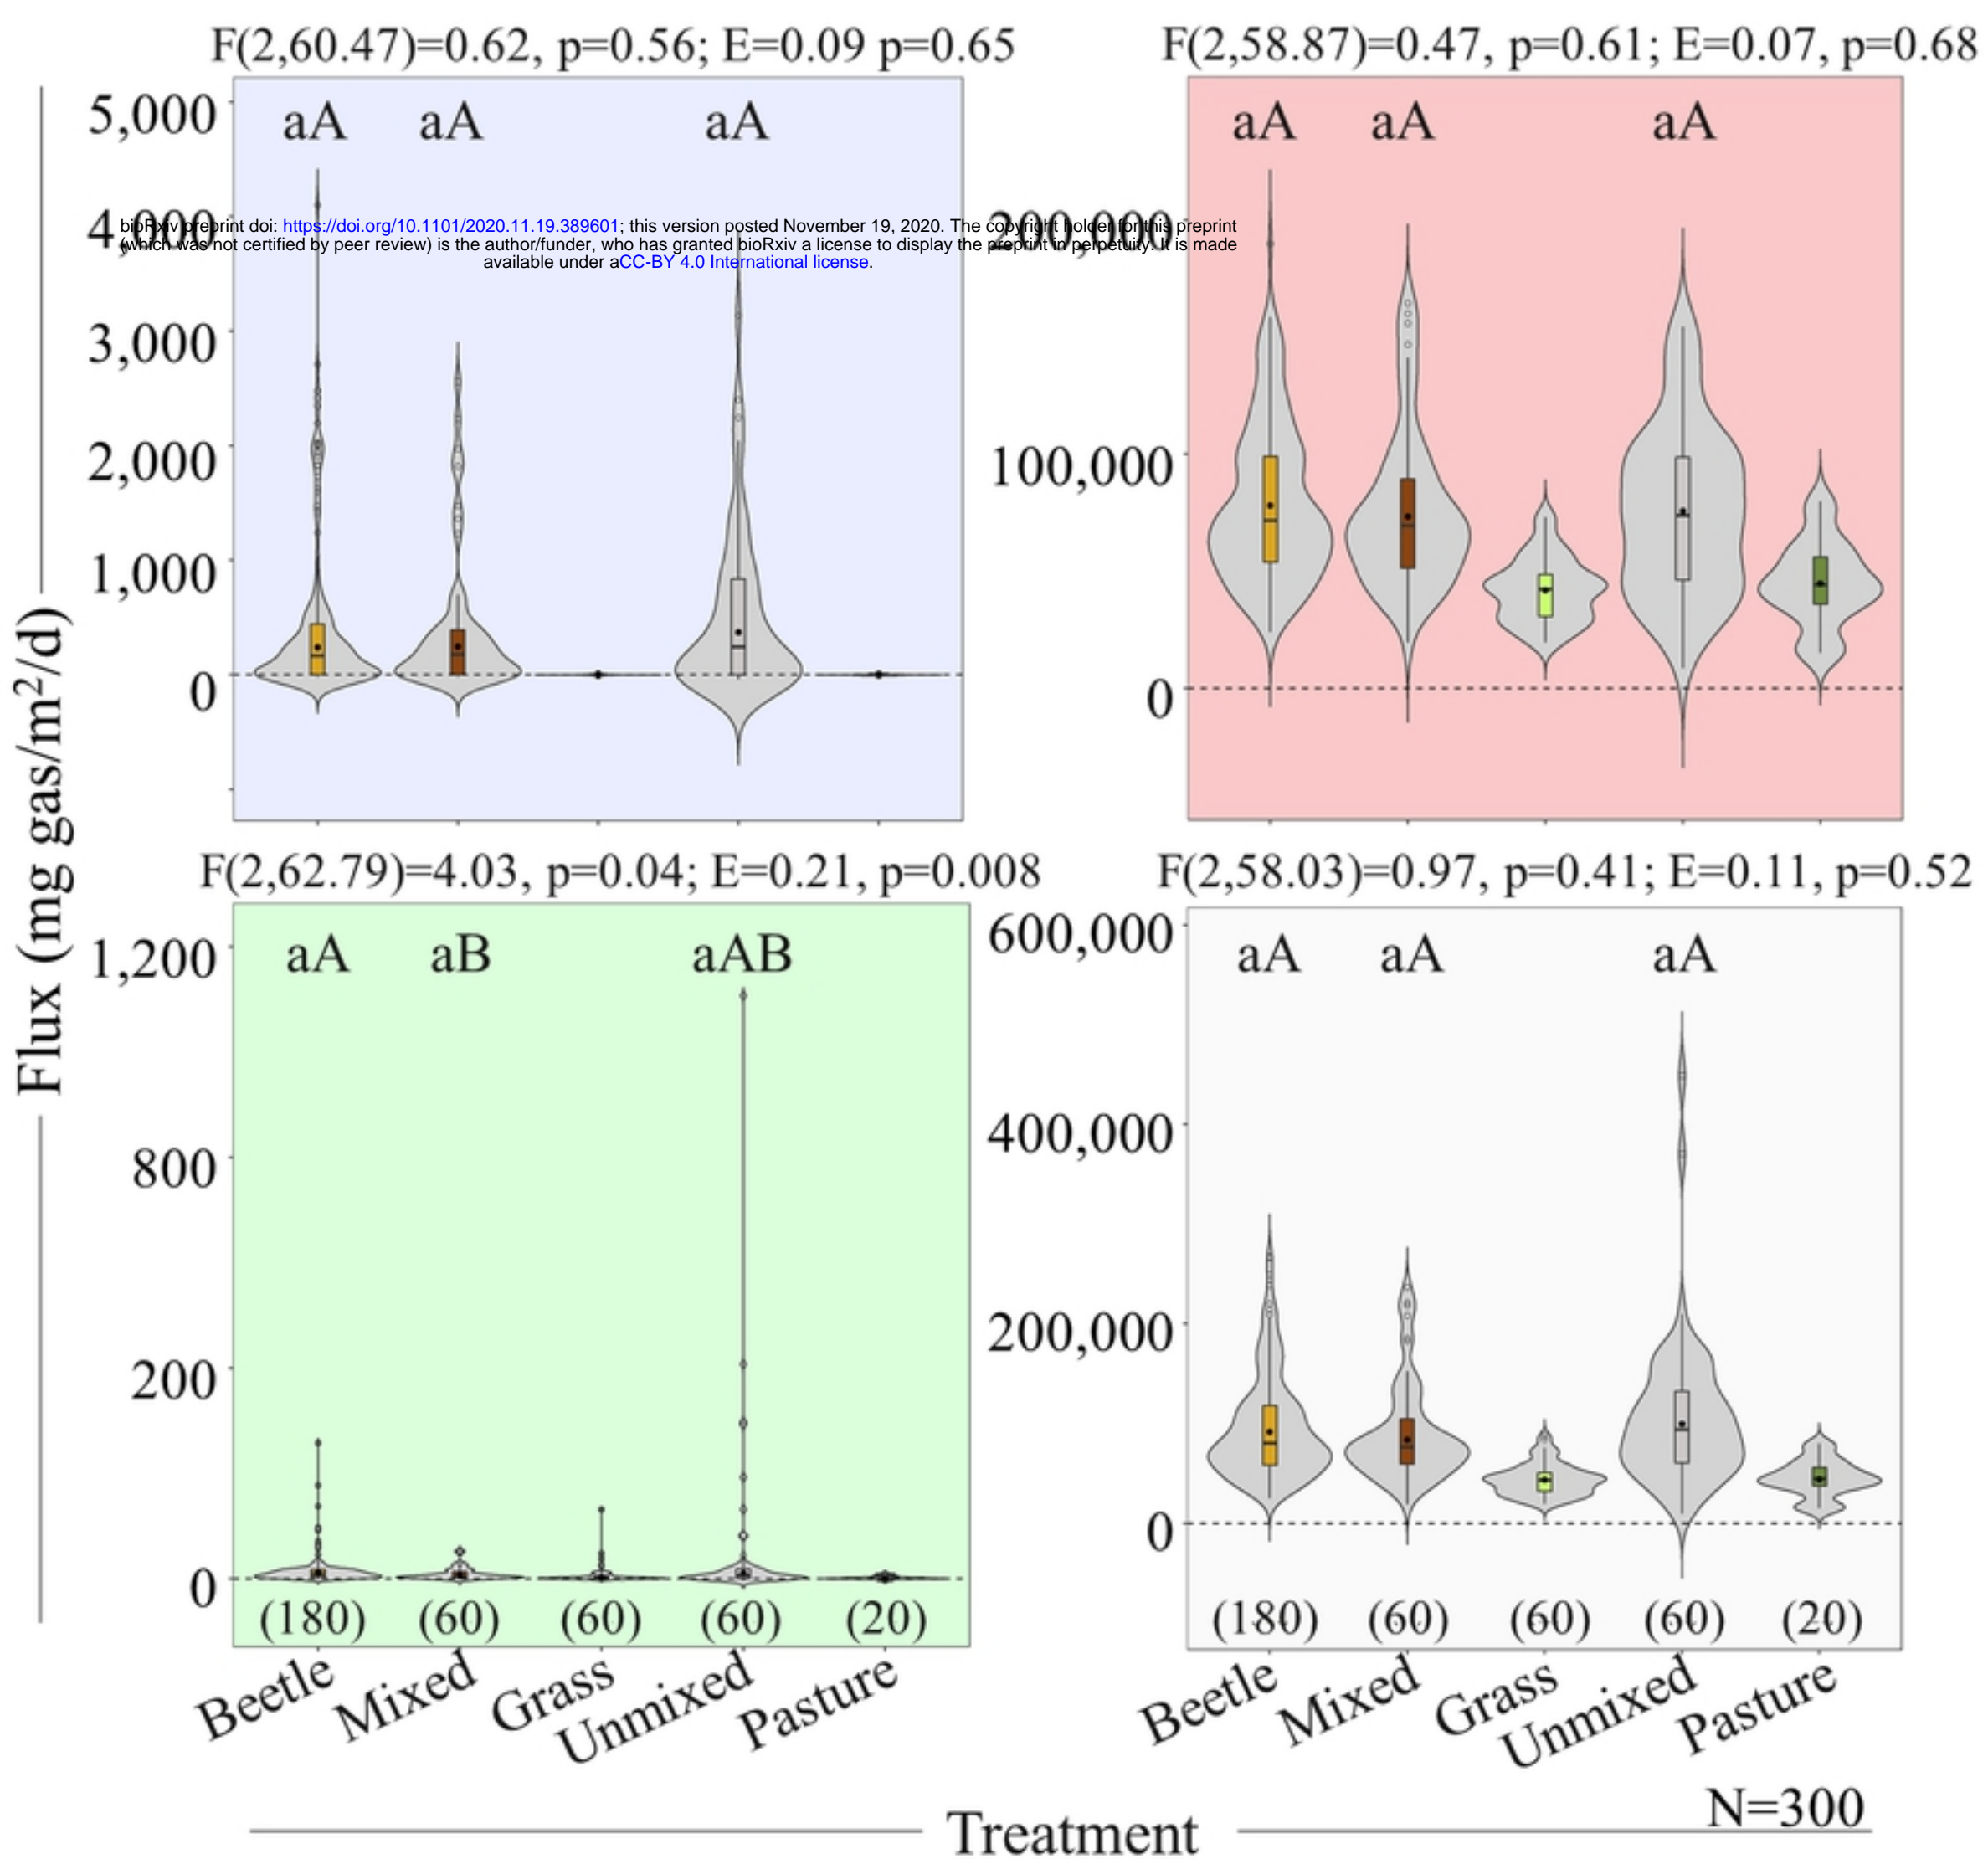

Fig 3

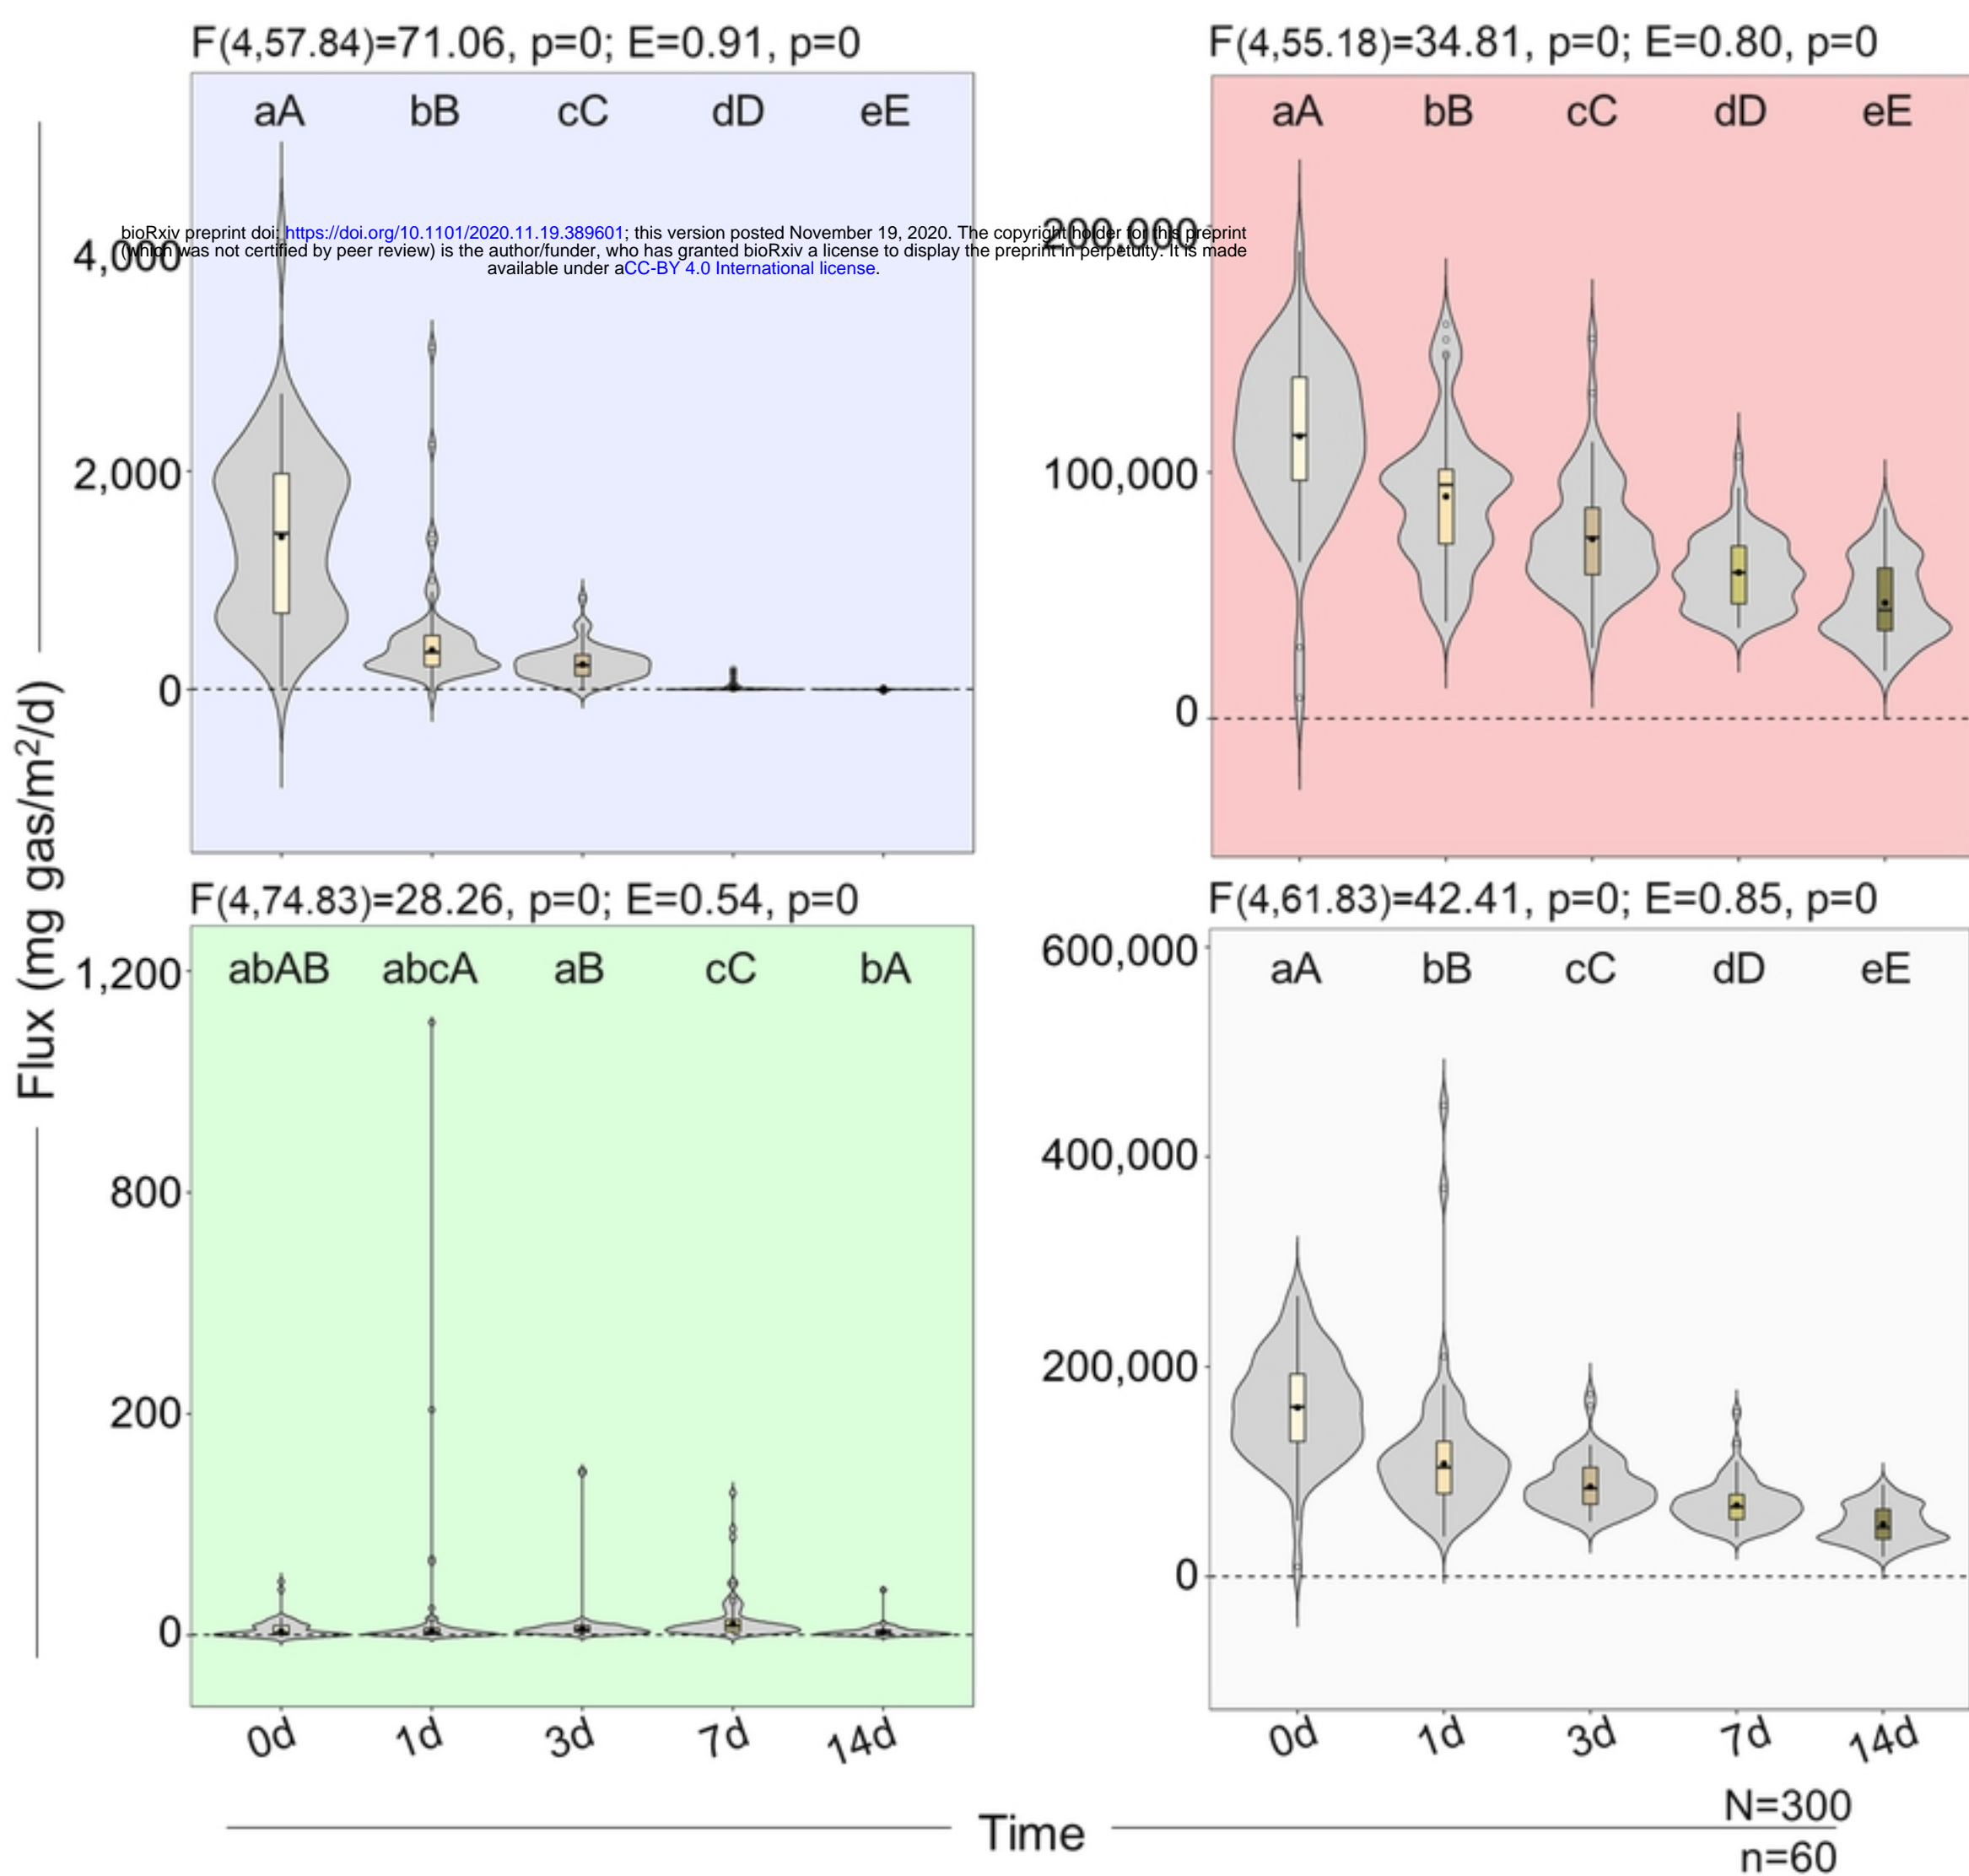

Fig 4

bioRxiv preprint doi: <https://doi.org/10.1101/2020.11.19.389601>; this version posted November 19, 2020. The copyright holder for this preprint (which was not certified by peer review) is the author/funder, who has granted bioRxiv a license to display the preprint in perpetuity. It is made available under aCC-BY 4.0 International license.

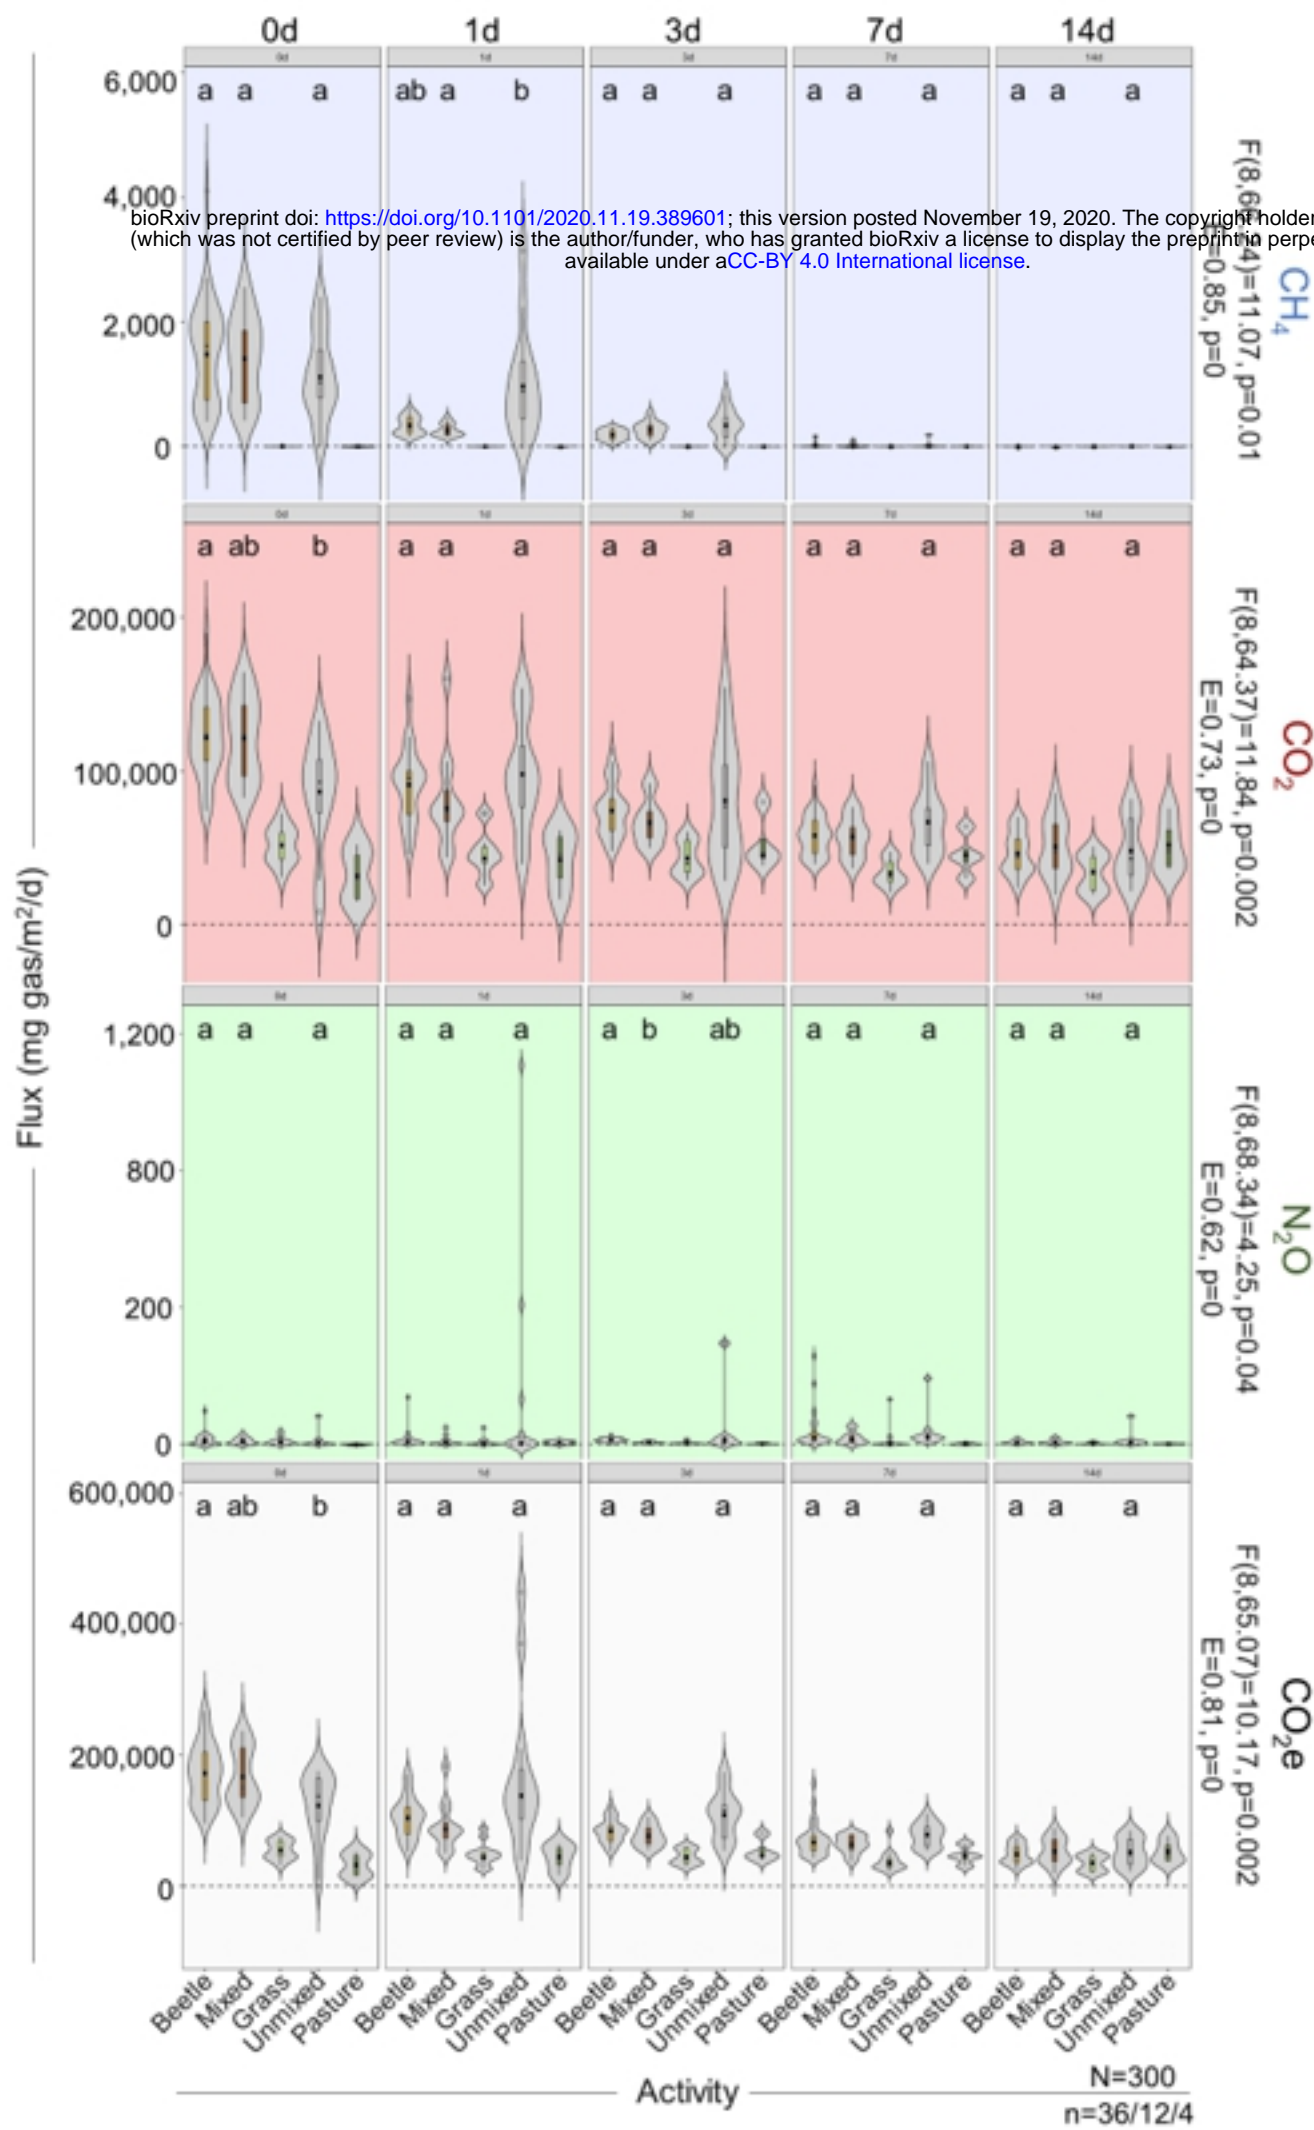

Fig 5

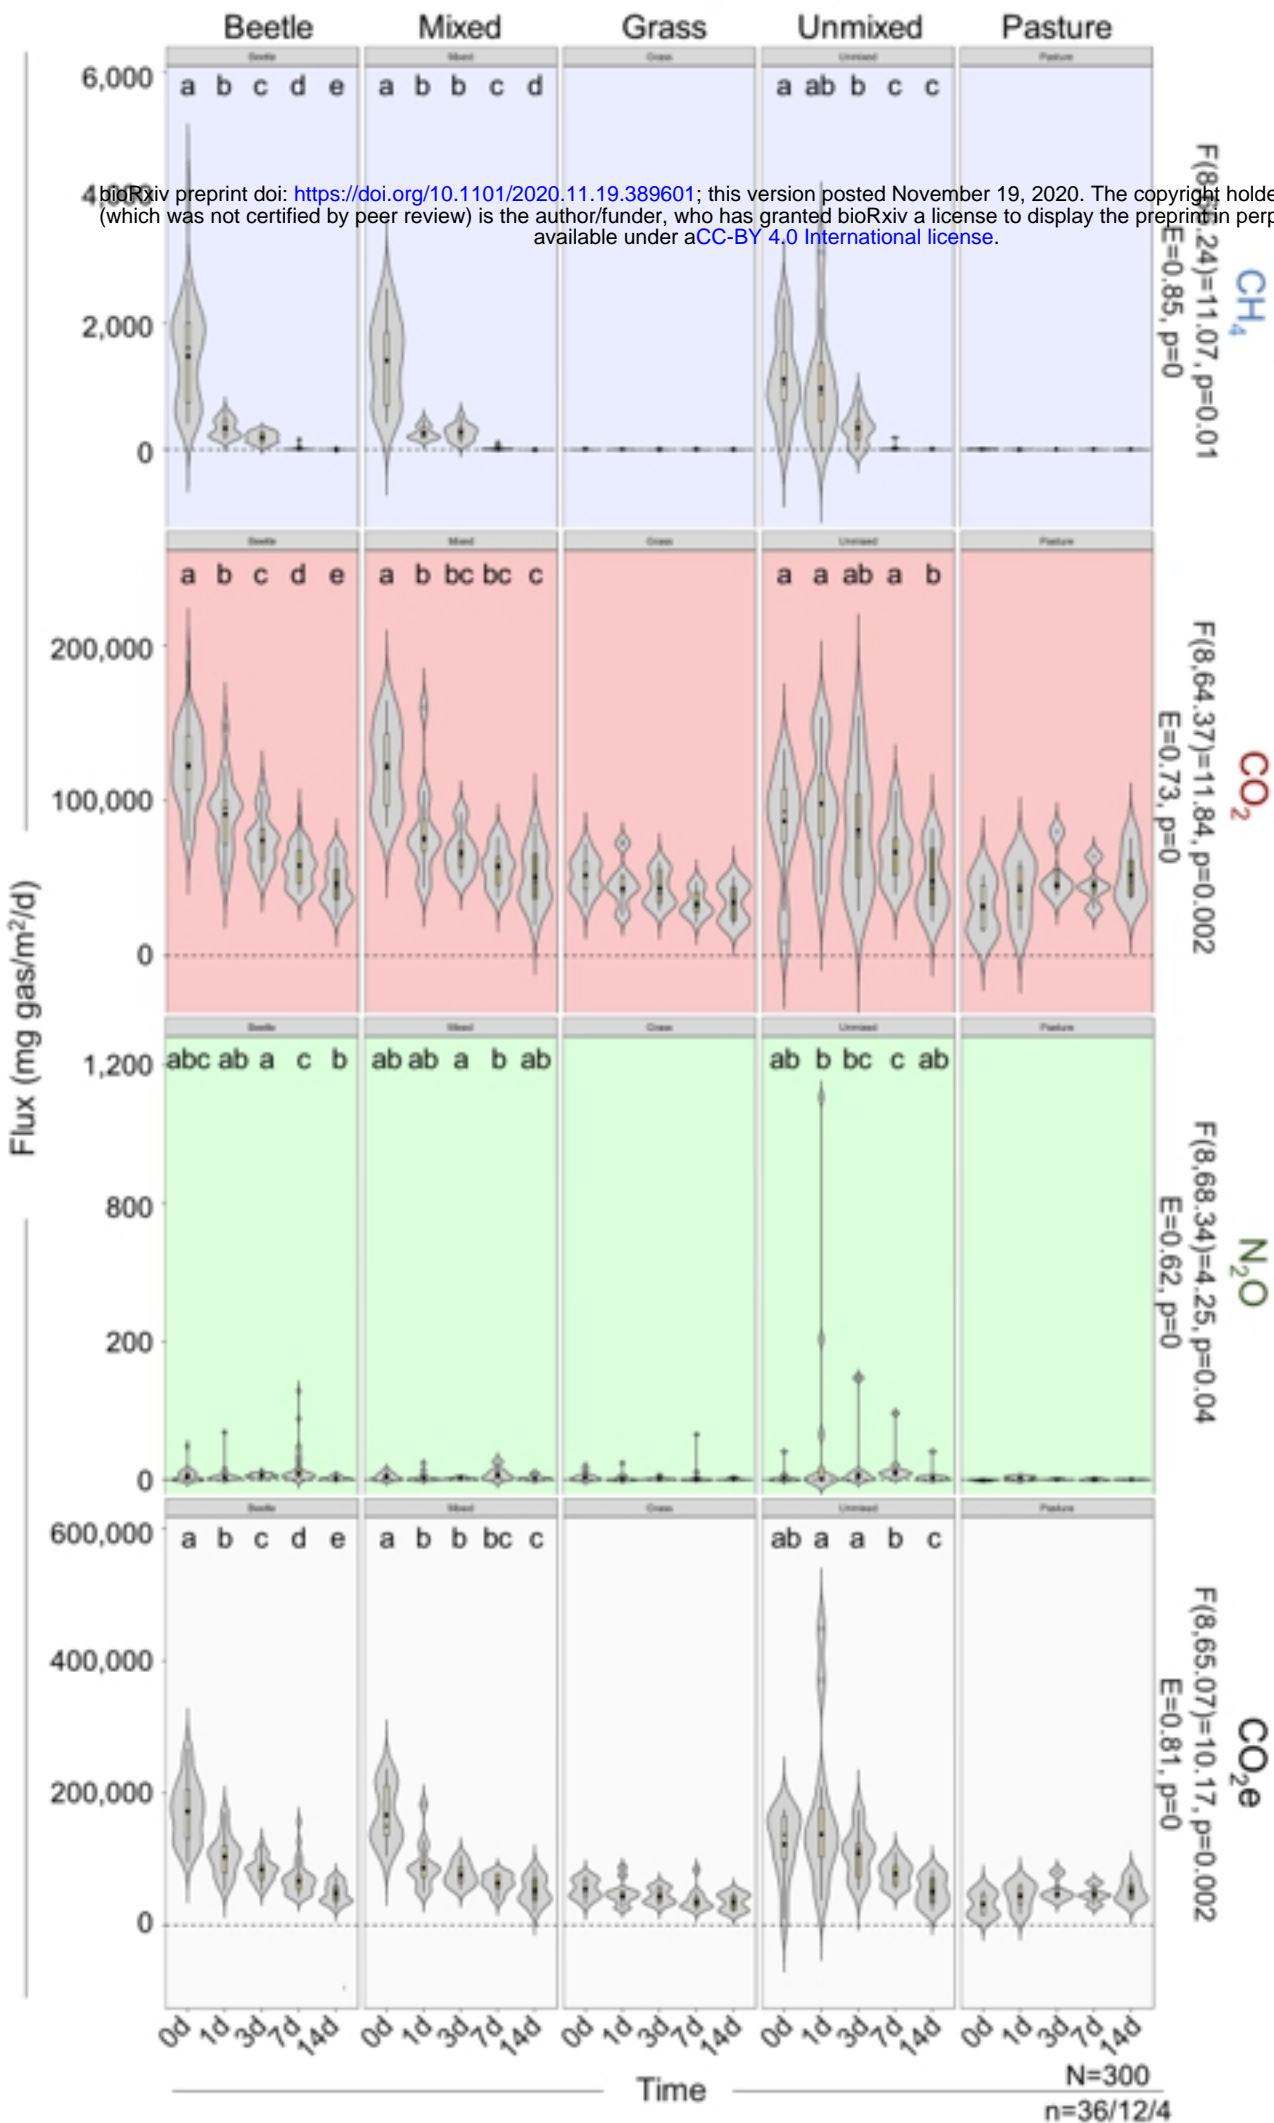

Fig 6
